## Metabolic potential for reductive acetogenesis and a novel energy-converting [NiFe] hydrogenase in *Bathyarchaeia* from termite guts – a genome-centric analysis

1 Hui Qi Loh<sup>1</sup>, Vincent Hervé<sup>1</sup>, Andreas Brune<sup>1\*</sup>

2 <sup>1</sup>Research Group Insect Microbiology and Symbiosis, Max Planck Institute for Terrestrial  
3 Microbiology, Marburg, Germany

4 \* **Correspondence:**

5 Andreas Brune

6 [brune@mpi-marburg.mpg.de](mailto:brune@mpi-marburg.mpg.de)

7

8 ORCID:

9 Hui Qi Loh: <https://orcid.org/0000-0002-4613-2477>

10 Vincent Hervé: <http://orcid.org/0000-0002-3495-561X>

11 Andreas Brune: <http://orcid.org/0000-0002-2667-4391>

12

13 **Keywords:** Bathyarchaeota, Homoacetogens, Wood–Ljungdahl pathway, Termites, Gut microbiota,  
14 Comparative genomics, Metagenome-assembled genomes.

15

## 16 **Abstract**

17 Symbiotic digestion of lignocellulose in the hindgut of higher termites is mediated by a diverse  
18 assemblage of bacteria and archaea. During a large-scale metagenomic study, we reconstructed 15  
19 metagenome-assembled genomes (MAGs) of *Bathyarchaeia* that represent two distinct lineages in  
20 subgroup 6 (formerly MCG-6) unique to termite guts. One lineage (TB2; *Candidatus*  
21 *Termitimicrobium*) encodes all enzymes required for reductive acetogenesis from H<sub>2</sub> and CO<sub>2</sub> via an  
22 archaeal variant of the Wood–Ljungdahl pathway. This includes a novel 11-subunit hydrogenase,  
23 which possesses the genomic architecture of the respiratory Fpo-complex of other archaea but whose  
24 catalytic subunit is phylogenetically related to and shares the conserved [NiFe] cofactor-binding  
25 motif with [NiFe] hydrogenases of subgroup 4g. We propose that this novel Fpo-like hydrogenase  
26 provides the reduced ferredoxin required for CO<sub>2</sub> reduction and is driven by the electrochemical  
27 membrane potential generated from the ATP conserved by substrate-level phosphorylation. Members  
28 of the other lineage (TB1; *Candidatus* *Termiticorpusculum*) are not capable of lithotrophic  
29 acetogenesis because they consistently lack hydrogenases and/or methylene-tetrahydromethanopterin  
30 reductase, a key enzyme of the pathway. Both lineages have the genomic capacity to reduce  
31 ferredoxin by oxidizing amino acids and might conduct methylotrophic acetogenesis using  
32 unidentified methylated compound(s). Our results indicate that *Bathyarchaeia* of subgroup 6  
33 contribute to acetate formation in the guts of higher termites and substantiate the genomic evidence  
34 for reductive acetogenesis from organic substrates, including methylated compounds, in other  
35 uncultured representatives of the phylum.

36

## 37 1 Introduction

38 Although *Bathyarchaeia* are widespread in anoxic environments, their physiology is only poorly  
39 understood. In the absence of any isolates and only few microscopic observations of their cells (Collins  
40 *et al.*, 2005, Kubo *et al.*, 2012), our knowledge about this deep-branching lineage is based almost  
41 exclusively on amplicon libraries of archaeal 16S rRNA genes and metagenomic studies (reviewed by  
42 Zhou *et al.* (2018)).

43 Ribosomal RNA genes affiliated with the “Miscellaneous Crenarchaeotal Group” (MCG) had already  
44 been recovered in early analyses of archaeal diversity in diverse anoxic habitats (e.g., Schleper *et al.*,  
45 1997, Inagaki *et al.*, 2003, Ochsenreiter *et al.*, 2003), including the intestinal tract of termites (Friedrich  
46 *et al.*, 2001). Meanwhile, an enormous diversity of sequences from this group, which comprises  
47 numerous deep-branching lineages, has been recovered from a wide range of marine and freshwater  
48 habitats and terrestrial environments (e.g., Kubo *et al.*, 2012, Fillol *et al.*, 2016). A few years ago, the  
49 MCG was elevated to the phylum level (*Bathyarchaeota*; Meng *et al.*, 2014), but the most recent  
50 genome-based taxonomy demoted them again to the class level (*Bathyarchaeia*; Rinke *et al.*, 2020).  
51 While the rank of the taxon is not relevant in the current context, we maintained the subgroup  
52 numbering used in previous studies (e.g., Kubo *et al.*, 2012; Lazar *et al.*, 2016) but replaced the prefix  
53 ‘MCG-’ with the prefix ‘Bathy-’ (Yu *et al.*, 2018).

54 The abundance of *Bathyarchaeia* in many anoxic habitats implies potentially important roles in  
55 biogeochemical cycles (Evans *et al.*, 2015; He *et al.*, 2016). Reconstruction of metagenome-assembled  
56 genomes (MAGs) provided information concerning the metabolic capacities of *Bathyarchaeia* and  
57 inspired predictions of their putative roles in anoxic sediments (reviewed by Zhou *et al.*, 2018). Several  
58 studies suggested that *Bathyarchaeia* are organotrophic and utilize a variety of organic substrates (e.g.,  
59 Meng *et al.*, 2014; He *et al.*, 2016; Lazar *et al.*, 2016). The discovery of genes encoding a methyl-  
60 coenzyme M reductase (Mcr) complex and a complete Wood–Ljungdahl pathway in bathyarchaeon  
61 BA1 provided the first evidence of methanogenesis outside the Euryarchaeota (Evans *et al.*, 2015).  
62 Other studies detected key enzymes of the pathway in bathyarchaeal genomes of several subgroups  
63 and proposed that these lineages are involved in reductive acetogenesis from CO<sub>2</sub> (He *et al.*, 2016,  
64 Lazar *et al.*, 2016).

65 Considering the putative roles of *Bathyarchaeia* in methanogenesis and reductive acetogenesis and the  
66 evidence for the utilization of lignin-derived methoxy groups (Yu *et al.*, 2018), the presence of this  
67 group in termite guts is intriguing. Termites efficiently digest wood and other lignocellulosic  
68 substrates, either sound or in different stages of humification (Brune, 2014), in symbiosis with a  
69 specialized gut microbiota housed in their enlarged hindgut compartments (Brune and Dietrich, 2015).  
70 Hydrogen produced in microbial fermentation processes serves as electron donor for the reduction of  
71 CO<sub>2</sub>, yielding acetate and methane as major products (Breznak and Switzer, 1986; Brauman *et al.*,  
72 1992). Methanogenesis in termite guts involves a diverse assemblage of hydrogenotrophic and methyl-  
73 reducing archaea (Brune, 2018), but reductive acetogenesis, which can contribute up to two-thirds of  
74 total acetate production, has so far been considered a bacterial activity.

75 In lower termites, reductive acetogenesis has been attributed to homoacetogenic members of the  
76 phylum *Spirochaetes* (e.g., Leadbetter *et al.*, 1999, Ohkuma *et al.*, 2015) and a novel lineage of  
77 uncultured *Deltaproteobacteria* (Rosenthal *et al.*, 2013; Ikeda-Ohtsubo *et al.*, 2016). In higher termites  
78 (family Termitidae), which diverged from the lower termites about 50 million years ago (Bucek *et al.*,  
79 2019), the situation is more complex. Particularly in the humus-feeding and soil-feeding groups, where  
80 the potential rates of reductive acetogenesis decrease in favor of methanogenesis (Brauman *et al.*, 1992;

81 Tholen and Brune, 1999), spirochetes are less abundant than in wood-feeding groups (Mikaelyan *et*  
82 *al.*, 2016). A study based on the formyltetrahydrofolate synthetase (FTHFS) gene, a key enzyme of the  
83 Wood–Ljungdahl pathway that has been used as a marker for reductive acetogenesis, indicated that the  
84 community of potential acetogens shifts from spirochetes in lower termites to clostridia in higher  
85 termites (Ottesen and Leadbetter, 2011).

86 In a large-scale metagenomic study of the gut microbiota of eight higher termites, we obtained 15  
87 metagenome-assembled genomes (MAGs) assigned to *Bathyarchaeia* (Hervé *et al.*, 2020). Preliminary  
88 analysis revealed that they fell into a cluster comprising mainly termite gut MAGs, with members of  
89 Bathy-1 and Bathy-6 as next relatives. Here, we conducted detailed phylogenomic analyses of these  
90 MAGs and investigated their potential capacity for methanogenesis and reductive acetogenesis using  
91 a genome-centric approach.

92

## 93 **2 Results and Discussion**

### 94 **2.1 Phylogeny of termite gut *Bathyarchaeia***

95 Bathyarchaeal MAGs were recovered from seven of the eight higher termites investigated, regardless  
96 of their feeding group (Hervé *et al.*, 2020; Table 1). Their absence from *Microcerotermes parvus* is  
97 most likely caused by the low total number of MAGs obtained from the metagenomes of this species.  
98 Based on average nucleotide identity, the MAGs were assigned to nine phylotypes (Table 1). MAGs  
99 of the same phylotype were always derived from different gut compartments of the same host  
100 species, indicating that they most likely represent bathyarchaeal populations distributed along the  
101 entire hindgut. Eleven of the 15 MAGs fulfill the criteria for high-quality MAGs (>90% complete  
102 and <5% contamination; Bowers *et al.*, 2017). Except for phylotype 5, each phylotype is represented  
103 by at least one high-quality MAG, which allows robust inference of metabolic potentials (Nelson *et*  
104 *al.*, 2020).

105 Phylogenomic analysis placed all phylotypes from termite guts within subgroup Bathy-6, an apical  
106 lineage of *Bathyarchaeia* that is well represented mostly in 16S rRNA gene libraries (He *et al.*, 2016)  
107 but comprises only a few MAGs from marine or estuarine sediments and the deep subsurface (Figure  
108 1). The MAGs from termite guts form two distinct lineages, TB1 (phylotypes 1–7) and TB2  
109 (phylotypes 8 and 9). TB2 is a sister group of bathyarchaeon SZUA-568 (hereafter denoted as Bathy-  
110 6-S), a MAG retrieved from marine hydrothermal vent sediments. Other MAGs in the radiation of  
111 Bathy-6 are bathyarchaea BE326-BA-RLH (hereafter denoted as Bathy-6-B) and AD8-1 (hereafter  
112 denoted as Bathy-6-A). They are all high-quality MAGs and were included in the subsequent  
113 analyses (Table 1). Only bathyarchaeon SG8-32-3 (previously assigned to Bathy-1) was omitted  
114 because the completeness of the assembly (50.4%; based on our CheckM analysis) was too low for a  
115 reliable assessment of its metabolic capacity.

116 Predicted genome sizes (1.0 – 2.5 Mbp), G+C contents (37.4 – 43.4 mol%), and coding densities  
117 (74.9 – 86.9%) of the MAGs from termite guts are in the same range as those of the other  
118 representatives of this subgroup (Table 1). While the average nucleotide identity (ANI) values among  
119 the phylotypes of TB1 and TB2 ranges between 78.1 and 81.6%, the ANI values between members  
120 of TB1, TB2, and the other phylotypes of Bathy-6 are below the cut-off of the fastANI tool (< 75%;  
121 Supplementary Figure S1), indicating that each lineage represents a separate genus-level taxon. This  
122 is confirmed by the results obtained with the GTDB toolkit, which classified members of TB1 and

123 TB2 as separate, genus-level lineages in the family UBA233 (order B26-1), a family that comprises  
124 also other members of Bathy-6. This indicates that TB1 and TB2 represent novel candidate genera in  
125 family UBA233, for which the names ‘*Candidatus Termiticorpusculum*’ and ‘*Candidatus*  
126 *Termitimicrobium*’ are proposed.

127 To identify the closest relatives of termite gut *Bathyarchaeia* and their respective habitats, we  
128 analyzed their phylogenetic position in the framework of rRNA genes available in public databases,  
129 which provides a much better coverage than the small number of MAGs of the Bathy-6 subgroup  
130 available to date (Figure 2). The 16S rRNA gene sequences encoded by the MAGs form a well-  
131 supported monophyletic group with all other sequences of *Bathyarchaeia* that were previously  
132 obtained from the hindguts of higher termites (Friedrich *et al.*, 2001; Shi *et al.*, 2015; Grieco *et al.*,  
133 2019). Although each ribotype appears to be specific for a particular host species, the internal  
134 topology of the termite clade is not well resolved due to the large number of short sequences and the  
135 absence of 16S rRNA genes from many MAGs. The sequences in the termite clade are most closely  
136 related to clones obtained from a manure pit (EU662668; J. Ding, unpublished) and an anaerobic  
137 digester fed with vinasses (U81774; Godon *et al.*, 1997), and fall into the radiation of bathyarchaeal  
138 lineages in freshwater sediments, salt marshes, and anaerobic wastewater bioreactors (group 1.3b;  
139 Ochsenreiter *et al.*, 2003; Collins *et al.*, 2005).

## 140 2.2 Capacity for CO<sub>2</sub>-reductive acetogenesis

141 We investigated the presence of all genes required for methanogenesis and reductive acetogenesis in  
142 all members of Bathy-6 with sufficiently complete genomes (Figure 3). All members of TB2  
143 (phylotypes 8 and 9) encode the complete set of genes required for the reduction of CO<sub>2</sub> to acetyl-  
144 CoA via the archaeal version of the Wood–Ljungdahl pathway, using methanofuran (MFR) and  
145 tetrahydromethanopterin (H<sub>4</sub>MPT) as C<sub>1</sub> carriers (Figure 4). Formyl-MFR dehydrogenase is  
146 molybdenum-dependent (FmdABCDF; Hochheimer *et al.*, 1996) and not the tungsten-dependent  
147 paralog. A homolog of *fmdE*, which occurs in methanogens, was not found in any of the MAGs,  
148 which suggests that the absence of subunit E is a characteristic feature of the bathyarchaeal complex.  
149 It has been shown that the Fmd complexes of *Methanobacterium thermoautotrophicum* and  
150 *Methanosarcina barkeri* are active also without this subunit (Hochheimer *et al.*, 1996, Vorholt *et al.*,  
151 1996). The CO dehydrogenase/acetyl-CoA synthase complex (CdhABCDE) and the (ADP-forming)  
152 acetyl-CoA synthetase (Acd; Musfeldt *et al.*, 1999) are typical archaeal enzymes.

153 Enzymes characteristic for the bacterial Wood–Ljungdahl pathway (FTHFS, methylene-THF  
154 cyclohydrolase/dehydrogenase, and methylene-THF reductase), which had been identified in MAGs  
155 of Bathy-3, -8 and -17 (Evans *et al.*, 2015, Zhou *et al.*, 2018), were not encoded by any member of  
156 Bathy-6. Also, phosphate acetyltransferase and acetate kinase, which are responsible for substrate-  
157 level phosphorylation in fermenting bacteria, were absent from all MAGs.

158 The same gene sets as in TB2 are encoded also by the more basal Bathy-6-S and Bathy-6-B (Figure  
159 3), which indicates that the capacity to produce acetate from CO<sub>2</sub> might be a plesiomorphic trait of  
160 the Bathy-6 subgroup. The consistent absence of a key enzyme of the archaeal Wood–Ljungdahl  
161 pathway, methylene-H<sub>4</sub>MPT reductase (Mer), from all seven phylotypes (11 MAGs) of the TB1  
162 lineage and from the most basal member of the subgroup, Bathy-6-A, suggests that the capacity to  
163 reduce CO<sub>2</sub> to the methyl level was lost at least twice during the evolutionary radiation of Bathy-6.

164 Homologs of the methyl-coenzyme M reductase (Mcr) complex, which encodes the key enzyme of  
165 methanogenesis, were not detected in any of the MAGs. Our observation contrasts with the report of



166 Harris *et al.* (2018), who claimed that Bathy-6-B might represent an anaerobic methane oxidizer.  
167 However, their conclusion is based on the recovery of a 265-bp gene fragment classified as an *mcrA*  
168 gene in the original metagenome from which Bathy-6-B was assembled, i.e., not from the  
169 metagenomic bin. Considering also that the gene fragment in question shows highest similarity to a  
170 homolog from an uncultured euryarchaeal methanogen (GenBank: JX907770.1), it seems safe to  
171 conclude that members of the Bathy-6 subgroup are not methanogenic.

172 Although the capacity of *Bathyarchaeia* for reductive acetogenesis from CO<sub>2</sub> has been claimed  
173 repeatedly for several subgroups (He *et al.*, 2016; Lazar *et al.*, 2016; Zhou *et al.*, 2018; Yu *et al.*,  
174 2018), the evidence was never fully conclusive. Actually, the recent, comprehensive survey of all  
175 bathyarchaeal MAGs compiled by Zhou *et al.* (2018) lists only two MAGs that encode all genes  
176 required to operate the entire Wood–Ljungdahl pathway. One is the putatively methanogenic BA1  
177 (Bathy-8) from a deep aquifer (Evans *et al.*, 2015); the other is bathyarchaeon ex4484\_135 (Bathy-  
178 15) from marine hydrothermal sediment (Dombrowski *et al.*, 2017).

### 179 **2.3 Capacity for methylotrophic acetogenesis**

180 Since all members of Bathy-6 encode a complete CO dehydrogenase/acetyl-CoA synthase (Cdh)  
181 complex (Figure 3), they might still synthesize acetyl-CoA using methyl groups derived from  
182 external sources. In all homoacetogenic bacteria and methylotrophic methanogens studied to date, the  
183 methyl transferase systems consist of three components: (i) a set of substrate-specific methyl  
184 transferases (MT-I), (ii) their cognate methyl-accepting corrinoid proteins (CoP), and (iii) a second  
185 methyl transferase (MT-II) that transfers the methyl group of methyl-CoPs to THF (bacteria) or  
186 coenzyme M (archaea) (van der Meijden *et al.*, 1983; Kreft and Schink, 1994; Kremp *et al.*, 2018;  
187 Supplementary Figure S4A). We found that all MAGs of Bathy-6 encode CoPs that fall into the  
188 radiation of homologs assigned to other uncultured Archaea, with the CoPs of the di- and  
189 trimethylamine-specific methyltransferase systems (MtbC and MttC) of *Methanomassiliicoccus*  
190 *luminyensis* (Kröniger *et al.*, 2017) and *Acetobacterium woodii* (Kremp *et al.*, 2018) as closest  
191 relatives with a reliable functional annotation (Supplementary Figure S4). However, unlike the  
192 situation in methylotrophic bacteria and euryarchaea, where the CoP gene is co-localized with the  
193 gene of the cognate substrate-specific MT-I homologs (MtbB or MttB), the CoP gene of Bathy-6 is  
194 flanked by a gene encoding subunit H of tetrahydromethanopterin S-methyltransferase (MtrH;  
195 Supplementary Figure S4B).

196 In many methanogenic archaea, MtrH is part of the energy-conserving MtrA–H complex and  
197 catalyzes the transfer of the (CO<sub>2</sub>-derived) methyl group from methyl-tetrahydromethanopterin to the  
198 corrinoid prosthetic group of MtrA (Hippler and Thauer, 1999). However, in obligately methyl-  
199 reducing methanogens (Galagan *et al.*, 2002; Borrel *et al.*, 2014; Lang *et al.*, 2015), which methylate  
200 CoM via their diverse methyltransferase systems (see above), the Mtr complex is absent. The  
201 presence of an isolated *mtrH* gene colocalized with a CoP gene has been observed also in the  
202 putatively methanogenic BA1 and BA2 (*Bathyarchaeia*) and several MAGs related to ‘*Ca.*  
203 *Methanomethylicus mesodigestum*’ (*Thermoproteota*). It was proposed that the encoded proteins  
204 represent methyltransferase systems, which prompted the hypothesis that these uncultured lineages  
205 are methylotrophic methanogens (Evans *et al.* 2015; Vanwonterghem *et al.* 2016).

206 It is tempting to assume that also the CoP–MtrH couple of Bathy-6 is involved in the transfer of  
207 methyl groups from so-far unidentified, substrate-specific methyltransferases to H<sub>4</sub>MPT (Figure 4).  
208 However, a catabolic role of the CoP–MtrH couple is not the only possible interpretation. In ‘*Ca.*  
209 *Methanomethylicus mesodigestum*’, the genes are colocalized with a homolog of *metE* encoding

210 methionine synthase (Supplementary Figure S4B), it is also possible that the CoP–MtrH couple of  
211 Bathy-6 is involved in anabolic reactions that transfer methyl groups (provided by the cleavage of  
212 acetyl-CoA) from H<sub>4</sub>MPT to an unknown acceptor.

## 213 2.4 Hydrogen as electron donor

214 The operation of the Wood–Ljungdahl pathway requires electron donors in the form of reduced  
215 ferredoxin, NADH, and in the case of archaea, also reduced cofactor F<sub>420</sub> (F<sub>420</sub>H<sub>2</sub>). The reduction of  
216 ferredoxin with H<sub>2</sub> is a critical step because it is endergonic at low hydrogen partial pressures and  
217 requires either an energy-converting hydrogenase or a flavin-based electron bifurcation system  
218 (Thauer *et al.*, 2008, Buckel and Thauer, 2013).

219 Hydrogenases are present only in TB2 and the basal lineages of TB1 (Figure 3). One is a cytosolic,  
220 bidirectional [NiFe] hydrogenase of Subgroup 3d, which use NAD as electron acceptor (Greening *et al.*,  
221 2016). Phylogenetic analysis of the gene encoding the large subunit (*hoxH*) placed all homologs  
222 in a sister position to the Hox hydrogenases of phototrophic bacteria (Supplementary Figure S5). The  
223 gene order in the *hoxEFUYH* cluster is the same as in the gene clusters of other Hox complexes,  
224 which encode a prototypical heterodimeric [NiFe]-hydrogenase moiety (HoxHY) and a diaphorase  
225 moiety (HoxEFU); HoxEFU is homologous to the NuoEFG module of complex I and mediates the  
226 electron transport to NAD(P) (Eckert *et al.*, 2012). Although members of Group 3 are called  
227 “bidirectional hydrogenases”, hydrogen formation requires reduced ferredoxin or flavodoxin as  
228 electron donor (Gutekunst *et al.* 2014).

229 All MAGs that encode a Hox hydrogenase also possess a gene cluster that resembles that encoding  
230 the F<sub>420</sub>:methanophenazine oxidoreductases (Fpo) of Euryarchaeota and the NADH:quinone  
231 oxidoreductases (Nuo) of Bacteria (complex I) (Figure 5). As in other basal lineages of complex I  
232 homologs, the FpoFO and NuoEFG modules, which provide substrate specificity for F<sub>420</sub>H<sub>2</sub> or  
233 NADH, respectively, are absent (Moparthy and Hägerhäll, 2011).

234 However, six of the 11 subunits common to the Fpo and Nuo complexes are homologous to subunits  
235 of the energy-converting [NiFe] hydrogenases of Group 4, which are ancestral to the respiratory  
236 complex I (Friedrich and Scheide, 2000). Classification with HydDB placed the D subunit of the 11-  
237 subunit complex of the Bathy-6 MAGs among the catalytic subunits of [NiFe] hydrogenases in  
238 Subgroup 4g. The hydrogenases in Subgroup 4g are not only structurally heterogeneous and differ  
239 fundamentally both in the number of their subunits and the arrangement of their coding genes  
240 (Greening *et al.*, 2016; Schoelmerich and Müller, 2019; Figure 5), but their large subunits also fall  
241 into separate phylogenetic lineages (Groups 4g-1 to 4g-6; Figure 6). The genomic architecture of the  
242 Fpo-like hydrogenase complex of Bathy-6 (hereafter referred to as Hfo) closely resembles that of *Ca.*  
243 *Methanomethylicus mesodigestum* (*Thermoproteota*) and *Pyrodictium delaney* (*Crenarchaeota*)  
244 (Figure 5), whose large subunits represent phylogenetic sister groups (4g-5 and 4g-6) that are distinct  
245 from the other lineages (Figure 6). Interestingly, the complex of *Thermosphaera aggregans*  
246 (Subgroup 4g-5) and other members of *Desulfurococcales* (not shown) seems to deviate from the  
247 Hfo-like structure and contains homologs of the Mbh complex of *Pyrococcus furiosus* (Figure 5).

248 None of the hydrogenases of Subgroup 4g have been biochemically characterized, but they are  
249 presumed to couple the formation of H<sub>2</sub> from reduced ferredoxin to the formation of an  
250 electrochemical membrane potential (Greening *et al.*, 2016; Søndergaard *et al.* 2016; Schoelmerich  
251 and Müller, 2019). This is in agreement with biochemical data obtained for the Fpo-like 11-subunit  
252 complex of methanogenic *Euryarchaeota*, which generate an electrochemical membrane potential

253 during electron transport from reduced ferredoxin to methanophenazine (*Methanosaeta*; Welte and  
254 Deppenmeier, 2011) or a so far unidentified electron acceptor (*Methanomassiliicoccales*; Kröninger  
255 *et al.*, 2016).

256 The presence of an Fpo-like 11-subunit hydrogenase in *Bathyarchaeia* is most interesting from an  
257 evolutionary perspective, since it represents the first [NiFe] hydrogenase with the genomic  
258 architecture of complex I. The coordination sites of the [NiFe] cofactor on the large subunit of all  
259 [NiFe] hydrogenases (L1 and L2 motifs; Vignais and Billoud, 2007), which are no longer conserved  
260 in NuoD and FpoD, are present in all Bathy-6 homologs (Figure 7). This adds to the evidence that the  
261 11-subunit complex of *Bathyarchaeia* is not a respiratory complex but is instead a novel energy-  
262 converting hydrogenase that catalyzes the reduction of ferredoxin with H<sub>2</sub> using the electrochemical  
263 membrane potential (Figure 4).

264 While Hox and Fpo-like hydrogenase in TB2 should provide the NADH and reduced ferredoxin  
265 required to operate the Wood–Ljungdahl pathway, the source of F<sub>420</sub>H<sub>2</sub> as potential electron donor  
266 for methylene-H<sub>4</sub>MPT reductase (Mer) remains unclear. A complete gene set encoding F<sub>420</sub>-reducing  
267 [NiFe] hydrogenase (FrhABG, subgroup 3a; Supplementary Figure S5) is present only in Bathy-6-A.  
268 All members of TB2 and several phylotypes of TB1 encode a homolog of FrhB, an iron–sulfur  
269 flavoprotein with an F<sub>420</sub>-binding site, but not the hydrogenase subunits (Figure 3). It is possible that  
270 FrhB is involved in the reduction of F<sub>420</sub> via an interaction with HdrABC, as proposed for the  
271 methane-oxidizing *Ca. Methanoperedens* spp. (Arshad *et al.*, 2015).

272 The only member of subgroup Bathy-6 that encodes a complete FrhABG is Bathy-6-A. It is also the  
273 only MAG that encodes a methylviologen-dependent [NiFe] hydrogenase (MvhADG; Supplementary  
274 Figure S5, subgroup 3c), which forms an electron-bifurcating complex with the soluble  
275 heterodisulfide reductase (HdrABC) and catalyzes the hydrogen-dependent reduction of ferredoxin  
276 and the heterodisulfide of coenzyme M (CoM) and coenzyme B (CoB) in methanogens (Kaster *et al.*,  
277 2011). The presence of genes encoding HdrABC, MvhADG, and a complete Wood–Ljungdahl  
278 pathway in the putatively methanogenic BA1 (Bathy-3) provides strong evidence that BA1 is capable  
279 of hydrogenotrophic methanogenesis (Evans *et al.*, 2015). In Bathy-6-A, however, the pathway is  
280 incomplete and the identity of the heterodisulfide reduced by Hdr remains unclear. Interestingly, the  
281 same constellation as in Bathy-6 has been recently reported for the bathyarchaeal MAG CR\_14 from  
282 marine sediments, which represents another, novel subgroup of *Bathyarchaeia* (Frag *et al.*, 2020).

## 283 **2.5 Organic substances as electron donors**

284 Most members of TB1 and all basal lineages of Bathy-6 lack Hox and Fpo-like hydrogenase (Figure  
285 3), which means that they cannot grow lithotrophically with H<sub>2</sub> as electron donor. However, the  
286 reduced Fd required to operate acetogenesis, either via the Wood–Ljungdahl pathway (TB2) or by  
287 methylotrophy (all phylotypes), could be provided also by the oxidation of organic substrates (Figure  
288 4). Such organotrophic acetogenesis is common among bacterial homoacetogens (Schink, 1994;  
289 Drake, 1994). All Bathy-6 genomes (except Bathy-6-A) encode pyruvate:ferredoxin oxidoreductase  
290 (Por) and indolepyruvate:ferredoxin oxidoreductase (Ior), and some also encode 2-  
291 oxoglutarate:ferredoxin oxidoreductase (Oor), all of which catalyze the oxidative decarboxylation of  
292 2-oxo acids to their corresponding acyl-CoA esters (Figure 3). The 2-oxo-acids would result from the  
293 transamination of amino acids via numerous aminotransferases encoded by all genomes; a putative  
294 amino acid permease, however is encoded only in TB2. ATP would be formed via the ADP-  
295 dependent acetyl-CoA synthetase, which accepts also other acyl substrates in *Pyrococcus furiosus*  
296 (Mai and Adams, 1996). Such pathways have been shown to operate in other archaea (*Pyrococcus*



297 *furiosus*, *Thermococcus* spp.; Kengen and Stams, 1993, Heider *et al.*, 1996) and in the insect gut-  
298 associated bacterium *Elusimicrobium minutum* (Herlemann, *et al.*, 2009) during growth on glucose,  
299 where they result in a net formation of alanine.

300 The data compiled by Zhou *et al.* (2018) suggest that several lineages of *Bathyarchaeia*, including  
301 Bathy-6-A; Lazar *et al.*, 2016), have the capacity to ferment various organic carbon compounds.  
302 However, genes encoding extracellular peptidases, which are numerous in other *Bathyarchaeia*, seem  
303 to be less prevalent in the MAGs of Bathy-6 and Bathy-1 (Feng *et al.*, 2019), which suggests that  
304 members of these subgroups are limited to the utilization of amino acids or oligopeptides that are  
305 small enough to be transported across the cytoplasmic membrane.

306 A capacity of members of Bathy-6 to utilize sugars is not as apparent. Like Bathy-6-A (Lazar *et al.*,  
307 2016), all MAGs of TB1 and TB2 encode many genes of the classical Embden-Meyerhof-Parnas  
308 (EMP) pathway, including glyceraldehyde-3-phosphate dehydrogenase and phosphoglycerate kinase.  
309 However, all MAGs lack hexokinase, the alternative archaeal glycolytic enzymes (Bräsen *et al.*,  
310 2014), and most MAGs lack phosphofructokinase and pyruvate kinase. It is possible that EMP  
311 pathway functions only in gluconeogenesis; fructose bisphosphatase is present in all MAGs. Sugar  
312 transporters were not detected; the role of the lipooligosaccharide ABC transporter encoded by  
313 almost all phylotypes from termite guts (except phylotype 9) is not clear (Supplementary Table S3).  
314 The identification of a cellulolytic system in Bathy-6-A (Lazar *et al.*, 2016) requires verification.

## 315 **2.6 Energy conservation**

316 In acetogenic bacteria growing on hydrogen and CO<sub>2</sub>, all ATP synthesized by substrate-level  
317 phosphorylation is consumed in the activation of formate. Therefore, energy conservation involves  
318 electron-transport phosphorylation, which is driven by the oxidation of reduced ferredoxin via  
319 membrane-bound electron-transport complexes (Schuchmann and Müller, 2014; Basen and Müller,  
320 2017). By contrast, the activation of formate (i.e., the formation of formylmethanofuran) in the  
321 archaeal variant of the Wood–Ljungdahl pathway is not ATP-dependent but is instead driven by the  
322 reducing power of ferredoxin, yielding a full ATP per acetate produced via substrate-level  
323 phosphorylation. However, thermodynamics dictates that a fraction of this ATP has to be reinvested,  
324 because a metabolism where the net ATP yield exceeds the free-energy change of the reaction would  
325 become endergonic (Thauer *et al.*, 2008).

326 Fermenting bacteria that lack respiratory chains energize their membrane by operating their ATP  
327 synthase in the reverse direction (Buckel and Thauer, 2013). Likewise, members of Bathy-6 that have  
328 the capacity to grow lithotrophically on hydrogen and CO<sub>2</sub> (i.e., the phylotypes in TB2) might use  
329 part of the ATP gained by substrate-level phosphorylation to generate an electrochemical membrane  
330 potential that drives the reduction of ferredoxin via the Fpo-like hydrogenase complex (see above).  
331 Other energy-converting complexes that would allow generation of reduced ferredoxin, such as the  
332 Group-4 [NiFe] hydrogenases in acetogenic bacteria and methanogenic archaea (Ech, Künkel *et al.*,  
333 2001; Eha and Ehb, Tersteegen and Hedderich, 2001) or an NADH:Fd oxidoreductase complex  
334 (RnfABCDEG, Westphal *et al.*, 2018) were not detected in any member of Bathy-6.

335 During fermentative growth, the Fpo-like hydrogenase complex (if present) might operate in the  
336 reverse direction, using reduced ferredoxin provided by the oxidation of organic substrates to  
337 produce H<sub>2</sub> and generate an electrochemical membrane potential, like many fermenting bacteria with  
338 an energy-converting hydrogenase. In that context, it is intriguing that several phylotypes of TB1 and  
339 TB2 (Figure 3), and also bathyarchaeal MAGs from other subgroups (Evans *et al.*, 2015; Zhou *et al.*,

340 2018), do not encode an ATP synthase (neither the genes for the archaeal V-type ATP synthase nor  
341 for the bacterial equivalent were detected). If one disregards the possibility of incomplete genome  
342 assemblies, these organisms must generate their membrane potential (vital for any organism) by other  
343 means.

344 In principle, the Wood–Ljungdahl pathway is reversible and can also oxidize acetate to H<sub>2</sub> and CO<sub>2</sub>  
345 given the appropriate thermodynamic framework. This has been demonstrated in syntrophic cultures  
346 of “Reversibacter”-like microorganisms with hydrogenotrophic partners (Lee and Zinder, 1988;  
347 Schnürer et al. 1997) and has been suggested to occur also in *Bathyarchaeia* (Evans et al., 2015;  
348 Xiang et al., 2017). However, at least in the termite hindgut, where the hydrogen partial pressure is  
349 much higher than in sediments (Ebert and Brune, 1997; Schmitt-Wagner et al., 1999) and reductive  
350 acetogenesis often prevails over methanogenesis as electron sink (Brauman et al., 1992; Tholen et al.  
351 1999, Tholen and Brune, 2000), an anaerobic oxidation of acetate is an unlikely scenario.

## 352 2.7 Ecological aspects

353 Although the proportion of archaeal rRNA in termite hindguts is relatively small (0.9–2.3% of all  
354 prokaryotic rRNA; Brauman et al., 2001), methanogenesis represents a substantial hydrogen sink  
355 (Brune, 2019). Considering that the proportion of reads assigned to bathyarchaeal MAGs in the  
356 hindgut metagenomes of higher termites (0.03–2.5%; avg. 0.69%) is four times higher than that  
357 assigned to euryarchaeal MAGs (0.02–0.79%; avg. 0.16%; Table S2 in Hervé et al., 2020), the  
358 population sizes of *Bathyarchaeia* might be sufficient to contribute significantly to acetogenesis,  
359 particularly in soil-feeding species.

360 However, the substrates of termite gut *Bathyarchaeia* remain open to speculation. While only  
361 members of TB2 have the genomic capacity for lithotrophic acetogenesis, almost all members of  
362 Bathy-6 have the capacity to ferment amino acids and might employ organotrophic acetogenesis from  
363 methylated substrates as an electron sink. Stable-isotope probing of salt marsh sediments indicated  
364 that members of Bathy-8 and Bathy-6 assimilate organic substrates, notably excluding proteins and  
365 inorganic carbon (Seyler et al., 2014). Yu et al. (2018), however, reported that addition of lignin to  
366 an estuarine sediment sample selectively stimulated the growth of Bathy-8 and the incorporation of  
367 carbon from <sup>13</sup>C-bicarbonate into archaeal tetraether lipids, which suggests that members of Bathy-8  
368 are methylotrophs that use lignin-derived methyl groups. Together with the potential capacity for  
369 methyl group utilization in many bathyarchaeotal MAGs (Seyler et al., 2014; Yu et al., 2018; this  
370 study), these results explain the observations of Lever et al. (2010), who found that porewater acetate  
371 in deep-subseafloor sediments was depleted in <sup>13</sup>C relative to sedimentary organic matter and  
372 postulated that a substantial fraction of the acetate produced in marine sediments might stem from  
373 reductive acetogenesis, fueled by microbial fermentation products, molecular hydrogen, and the  
374 methoxy groups of lignin monomers.

375 The utilization of the methoxy groups of lignin-derived aromatic compounds is a common trait of  
376 many acetogenic bacteria (Schink et al., 1992, Drake, 1994). Methoxylated aromatic compounds are  
377 demethylated by the hindgut microbiota of termites (Brune et al., 1995), but the organisms  
378 responsible for this activity have not been identified. It is tempting to speculate that termite gut  
379 *Bathyarchaeia* are organoheterotrophic (TB1) or lithoheterotrophic (TB2) acetogens that utilize  
380 methylated compounds such as lignin derivatives as methyl group donors and reduce CO<sub>2</sub> either with  
381 molecular hydrogen or with reducing equivalents derived from the oxidation of organic substrates.

382 It has been speculated that acetogenic archaea might have an energetic advantage over acetogenic  
383 bacteria, as they do not have to invest ATP to activate formate (He *et al.* 2016). However, the net  
384 synthesis of ATP is limited by the free-energy change of an acetogenic metabolism, which is  
385 independent of its reaction path and requires part of the ATP gained by substrate-level  
386 phosphorylation to be reinvested (e.g., for ferredoxin reduction; see above). Rather, it is feasible that  
387 the capacity for methylotrophic acetogenesis, which is less sensitive to low hydrogen partial  
388 pressures than hydrogenotrophic acetogenesis, provides an energetic advantage, analogous to the  
389 situation in methyl-reducing methanogens (Feldwert *et al.*, 2020). Moreover, it has been argued that  
390 long generation times contribute to the difficulties surrounding the enrichment and isolation of  
391 *Bathyarchaeia* in the laboratory (Yu *et al.* 2018). In view of the relatively short residence time of  
392 organic matter in termite guts (24 – 48 h; Kooor, 1967; Bignell *et al.*, 1980), the growth rates of  
393 termite gut *Bathyarchaeia* must be high enough to avoid washout – unless they are attached to the  
394 intestinal surface.

## 395 2.8 Taxonomy

### 396 *Candidatus Termiticorpusculum*

397 **Etymology:** L. n. *termes -itis*, a worm that eats wood, a termite; ; L. neut. n. *corpusculum*, a little  
398 body, a particle; N.L. neut. n. *Termiticorpusculum*, a little body associated with termites  
399 Uncultured. Unclassified genus-level lineage in the Bathy-6 subgroup of *Bathyarchaeia* (Fig. 1; TB1  
400 lineage). Comprises the phylotypes 1–7 (Table 1).

401 **Habitat:** The hindgut of higher termites

### 402 *Candidatus Termitimicrobium*

403 **Etymology:** L. n. *termes -itis*, a worm that eats wood, a termite; N.L. neut. n. *microbium*, microbe;  
404 from Gr. masc. adj. *mikros*, small; from Gr. masc. n. *bios*, life; N.L. neut. n. *Termitimicrobium*, small  
405 life(-form) associated with termites  
406 Uncultured. Unclassified genus-level lineage in the Bathy-6 subgroup of *Bathyarchaeia* (Fig. 1; TB2  
407 lineage). Comprises the phylotypes 8–9 (Table 1).

408 **Habitat:** The hindgut of higher termites

410

## 411 3 Conclusions

412 To date, the non-methanogenic archaea in termite guts and their potential role in symbiotic digestion  
413 have received little attention. Our study provides strong evidence that termite gut *Bathyarchaeia* and  
414 other members of the Bathy-6 subgroup are archaeal acetogens: they possess the genomic potential to  
415 conserve energy by the production of acetyl-CoA from CO<sub>2</sub> (*Ca.* *Termitimicrobium*; TB2) and/or  
416 possibly methyl groups (almost all members of Bathy-6, including *Ca.* *Termiticorpusculum*; TB1).  
417 As in bacterial acetogens, their energy metabolism is likely mixotrophic. We identified a complete  
418 gene set encoding a novel Fpo-like 11-subunit hydrogenase, which closes the evolutionary gap  
419 between the ancestral [NiFe] hydrogenases and the respiratory complex I and would enable members  
420 of TB2 to grow lithotrophically on H<sub>2</sub>. All members of Bathy-6 probably derive reducing equivalents  
421 from the oxidation of organic substrates (*viz.*, amino acids) and might use reductive acetogenesis as  
422 an electron sink.

423 These findings agree with previous claims concerning the capacity for reductive acetogenesis in other  
424 subgroups of *Bathyarchaeia*. However, this is the first time that all genes encoding the Wood–  
425 Ljungdahl pathway and the components required for the provision of reducing equivalents and

426 energy conservation are conclusively documented. Although eight of the nine closely related  
427 phylotypes of termite gut *Bathyarchaeia* were represented by high-quality MAGs, a complete  
428 pathway was detected only in members of TB2 and two more basal lineages from other  
429 environments. This underscores the long-standing caution that the mere presence of marker genes of  
430 the Wood–Ljungdahl pathway do not qualify an organism as an acetogen since many of its enzymes  
431 are found also in non-acetogenic organisms, where they are involved in the assimilation and  
432 interconversion of C<sub>1</sub> metabolites (Drake, 1994).

433

## 434 **4 Experimental procedures**

### 435 **4.1 Metagenome-assembled genomes (MAGs)**

436 Data on the MAGs from termite guts are from Hervé *et al.* (2020). All other MAGs were retrieved  
437 from the NCBI Assembly database (<https://www.ncbi.nlm.nih.gov>); accession numbers are listed in  
438 Table 1. Assembly coverage was determined as described by Hervé *et al.* (2020). Average nucleotide  
439 acid identities (ANI) were calculated with fastANI (Jain *et al.*, 2018). Protein-coding genes were  
440 predicted with Prodigal v2.6.3 (Hyatt *et al.*, 2010).

### 441 **4.2 Genome phylogeny**

442 A concatenated gene tree of bathyarchaeotal MAGs was constructed using the deduced amino acid  
443 sequences of 43 marker genes extracted with CheckM v1.0.8 (Parks *et al.*, 2015). The sequences  
444 were aligned using MAFFT v7.305b with the FFT-NS-2 method, and the resulting alignment was  
445 filtered using trimAL v1.2 with the gappyout method (Capella-Gutiérrez *et al.*, 2009, Katoh and  
446 Standley, 2013). Tree topology was inferred with IQ-TREE (multicore v1.6.11; Nguyen *et al.*, 2015)  
447 using the best-fit evolutionary model suggested by ModelFinder under the Bayesian Information  
448 Criterion (Kalyaanamoorthy *et al.*, 2017); node support was assessed using the Shimodaira–  
449 Hasegawa approximate-likelihood-ratio test (SH-aLRT) with 1,000 resamplings (Lemoine *et al.*,  
450 2018).

451 Taxonomic classification was done with the GTDB-tk version 0.3.2 using the Genome Taxonomy  
452 Database (GTDB) release 04-RS89 (<https://gtdb.ecogenomic.org/>; Chaumeil *et al.*, 2018).

### 453 **4.3 16S rRNA gene phylogeny**

454 SSU rRNA gene sequences in the MAGs and other bathyarchaeotal bins obtained from the original  
455 metagenomes (Hervé *et al.*, 2020) were identified using the *ssu\_finder* function implemented in  
456 CheckM. Sequences were imported into the alignment of rRNA gene sequences in the SILVA  
457 SSURef NR database release 132 (<https://www.arb-silva.de>; Quast *et al.*, 2013) using Arb v6.0.6  
458 (Ludwig *et al.*, 2004). After automatic alignment of the imported sequences using the *PT server* and  
459 the *Fast Aligner* tool implemented in Arb, the alignment was manually refined using the Arb editor,  
460 considering secondary structure information to identify homologous base positions. After removing  
461 sites with more than 50% gaps, the alignment consisted of 1,424 sites with unambiguously aligned  
462 base positions. Phylogenetic trees were reconstructed by maximum-likelihood analysis with IQ-  
463 TREE using the best-fit evolutionary model (GTR+F+R4) suggested by ModelFinder; node support  
464 was assessed using SH-aLRT with 1,000 resamplings. Gene fragments (<1,300 bp) were inserted into  
465 the core tree using the *parsimony* tool implemented in Arb.



#### 466 4.4 Gene discovery and annotation

467 For an initial exploration of the genes potentially involved in energy metabolism, bathyarchaeotal  
468 MAGs were analyzed using the annotation provided in the IMG/Mer database  
469 (<https://img.jgi.doe.gov/mer/>; Chen *et al.*, 2019). Annotation results were verified, and missing  
470 functions were identified with Hidden Markov Model (HMM) searches, using HMMER v3.1b2  
471 (Eddy, 2011) with a threshold E-value of  $1E-5$ ; the respective models are listed in Table S3. The  
472 identity of all genes of interest was confirmed using the NCBI Conserved Domain search (Marchler-  
473 Bauer and Bryant, 2004) and BLASTp (Altschul *et al.*, 1990). Additionally, Bathy-6-S, and Bathy-6-  
474 B were annotated with BlastKOALA (Kanehisa *et al.*, 2016). When indicated, closest neighbors were  
475 identified by BLAST, aligned using MAFFT v7.305b with the L-INS-i method (Katoh and Standley,  
476 2013). Phylogenetic trees were reconstructed by maximum-likelihood analysis with IQ-TREE  
477 (Nguyen *et al.* 2015) using the best-fit evolutionary model (LG+G+I) suggested by ModelFinder  
478 (Kalyaanamoorthy *et al.*, 2017). Node support was assessed using SH-aLRT with 1,000 resamplings  
479 (Lemoine *et al.* 2018).

#### 480 4.5 Analysis of [NiFe] hydrogenases

481 Putative [NiFe] hydrogenase genes were identified by HMM searches (see above), using the highly  
482 resolved models provided by Anantharaman *et al.* (2016). Search results were confirmed with  
483 HydDB, a web-based tool for hydrogenase classification and analysis  
484 (<https://services.birc.au.dk/hyddb/>; Søndergaard *et al.*, 2016).

485 The deduced amino acid sequences of the large subunit (LSU) of [NiFe] hydrogenases recovered  
486 from the MAGs and their top BLAST hits on the IMG/Mer database were imported into an alignment  
487 of NuoD and FpoD homologs (Lang *et al.*, 2015), which was completed with representative members  
488 of other hydrogenase classes extracted from HydDB. The alignment was manually refined in the Arb  
489 editor. Phylogenetic trees were reconstructed by maximum-likelihood analysis with IQ-TREE  
490 (Nguyen *et al.* 2015) using the best-fit evolutionary model (LG+G+I) suggested by ModelFinder  
491 (Kalyaanamoorthy *et al.*, 2017). Node support was assessed using SH-aLRT with 1,000 resamplings  
492 (Lemoine *et al.* 2018).

493

#### 494 5 Author Contributions

495 HQL and AB designed the study. HQL analysed data and wrote the first draft of the manuscript. VH  
496 contributed to the analyses. AB analysed data and revised the manuscript. All authors edited and  
497 approved the final version of the manuscript.

498

#### 499 6 Acknowledgments

500 This study was funded by the Deutsche Forschungsgemeinschaft (DFG) in the Collaborative  
501 Research Center SFB 987 and by the Max Planck Society. HQL was supported by a doctoral  
502 fellowship of the International Max Planck Research School for Environmental, Cellular and  
503 Molecular Microbiology (IMPRS-Mic), Marburg, Germany.



504 The authors thank the Joint Genome Institute for their metagenome sequencing service and for  
505 providing the IMG/ER platform.

506

## 507 **7 References**

508 Altschul, S.F., Gish, W., Miller, W., Myers, E.W. and Lipman, D.J. (1990). Basic local alignment  
509 search tool. *J Mol Bio* 215: 403-410.

510 Anantharaman, K., Brown, C.T., Hug, L.A., Sharon, I., Castelle, C.J., Probst, A.J. *et al.* (2016).  
511 Thousands of microbial genomes shed light on interconnected biogeochemical processes in an  
512 aquifer system. *Nat Comm* 7: 13219.

513 Arshad, A., Speth, D.R., de Graaf, R.M., Op den Camp, H.J.M., Jetten, M.S.M. and Welte, C.U.  
514 (2015). A metagenomics-based metabolic model of nitrate-dependent anaerobic oxidation of  
515 methane by *Methanoperedens*-like archaea. *Front Microbiol* 6: 1423.

516 Basen, M. and Müller, V. (2017). “Hot” acetogenesis. *Extremophiles* 21: 15–26.

517 Bignell, D.E., Oskarsson, H. and Anderson, J.M. (1980). Distribution and abundance of bacteria in  
518 the gut of a soil-feeding termite *Procupitermes aburiensis* (Termitidae, Termitinae). *J Gen*  
519 *Microbiol* 117:393–403

520 Borrel, G., Parisot, N., Harris, H.M., Peyretailade, E., Gaci, N., Tottey, W. *et al.* (2014).  
521 Comparative genomics highlights the unique biology of Methanomassiliicoccales, a  
522 Thermoplasmatales-related seventh order of methanogenic archaea that encodes pyrrolysine.  
523 *BMC Genomics* 15:679.

524 Bowers, R.M., Kyrpides, N.C., Stepanauskas, R., Harmon-Smith, M., Doud, D., Reddy, T.B.K. *et al.*  
525 (2017). Minimum information about a single amplified genome (MISAG) and a metagenome-  
526 assembled genome (MIMAG) of bacteria and archaea. *Nat Biotech* 35: 725–731.

527 Brauman, A.; Kane, M.D.; Labat, M.; Breznak, J.A. (1992). Genesis of acetate and methane by gut  
528 bacteria of nutritionally diverse termites. *Science* 257: 1384-1387.

529 Brauman, A., Dore, J., Eggleton, P., Bignell, D., Breznak, J.A. and Kane, M.D. (2001). Molecular  
530 phylogenetic profiling of prokaryotic communities in guts of termites with different feeding  
531 habits. *FEMS Microbiol Ecol* 35: 27–36.

532 Breznak, J.A. and Switzer, J.M. (1986). Acetate synthesis from H<sub>2</sub> plus CO<sub>2</sub> by termite gut microbes.  
533 *Appl Environ Microbiol* 52: 623-630.

534 Brune, A. (2014). Symbiotic digestion of lignocellulose in termite guts. *Nat Rev Microbiol* 12: 168–  
535 180.

536 Brune, A. (2018). Methanogens in the digestive tract of termites. In: (Endo)symbiotic methanogenic  
537 archaea. J.H.P. Hackstein (ed). Cham: Springer International Publishing, 81-101.

- 538 Brune, A. (2019) Methanogenesis in the digestive tracts of insects and other arthropods. In:  
539 *Biogenesis of Hydrocarbons (Book series: Handbook of Hydrocarbon and Lipid*  
540 *Microbiology)* (Stams, A.J.M., Sousa, D., eds.). Springer, Cham, pp. 229–260.
- 541 Brune, A. and Dietrich, C. (2015). The gut microbiota of termites: Digesting the diversity in the light  
542 of ecology and evolution. *Annu Rev Microbiol* 69: 145-166.
- 543 Brune, A., Miambi, E., Breznak, J.A. (1995). Roles of oxygen and the intestinal microflora in the  
544 metabolism of lignin-derived phenylpropanoids and other monoaromatic compounds by  
545 termites. *Appl Environ Microbiol* 61:7 2688-2695.
- 546 Bucek, A., Šobotník, J., He, S., Shi, M., McMahon, D.P., Holmes, E.C. *et al.* (2019). Evolution of  
547 termite symbiosis informed by transcriptome-based phylogenies *Curr Biol* 29:21.
- 548 Buckel, W. and Thauer, R.K. (2013) Energy conservation via electron bifurcating ferredoxin  
549 reduction and proton/Na<sup>+</sup> translocating ferredoxin oxidation. *Biochim Biophys Acta* 1827:  
550 94-113.
- 551 Capella-Gutiérrez, S., Silla-Martínez, J.M. and Gabaldón, T. (2009). trimAl: a tool for automated  
552 alignment trimming in large-scale phylogenetic analyses. *Bioinformatics* 25: 1972-1973.
- 553 Chaumeil, P. A., Mussig, A. J., Hugenholtz, P. and Parks, D. H. (2018). GTDB-Tk: a toolkit to  
554 classify genomes with the Genome Taxonomy Database. *Bioinformatics* btz848.
- 555 Chen, I.A., K. Chu, K. Palaniappan, M. Pillay, A. Ratner, J. Huang, M., *et al.* (2019) IMG/M v.5.0:  
556 an integrated data management and comparative analysis system for microbial genomes and  
557 microbiomes. *Nucleic Acids Res* 47: D666-d677.
- 558 Collins, G., O'Connor, L., Mahony, T., Gieseke, A., de Beer, D. and O'Flaherty, V. (2005).  
559 Distribution, localization, and phylogeny of abundant populations of *Crenarchaeota* in  
560 anaerobic granular sludge. *Appl Environ Microbiol* 71: 7523-7527.
- 561 Dombrowski, N., Seitz, K.W., Teske, A.P. and Baker, B.J. (2017). Genomic insights into potential  
562 interdependencies in microbial hydrocarbon and nutrient cycling in hydrothermal sediments.  
563 *Microbiome* 5, 106 (2017). <https://doi.org/10.1186/s40168-017-0322-2>
- 564 Drake, H.L. (1994). Acetogenesis, acetogenic bacteria, and the acetyl-CoA “Wood/Ljungdahl”  
565 Pathway: Past and current perspectives. In: Drake, H.L. (eds) *Acetogenesis*. Chapman & Hall  
566 *Microbiology Series (Physiology / Ecology / Molecular Biology / Biotechnology)*. Springer,  
567 Boston, MA
- 568 Eckert, C., Boehm, M., Carrieri, D., Yu, J., Dubini, A., Nixon, P.J. and Maness, P.-C. (2012) Genetic  
569 analysis of the Hox hydrogenase in the cyanobacterium *Synechocystis sp.* PCC 6803 reveals  
570 subunit roles in association, assembly, maturation, and function. *J Biol Chem* 287: 43502-  
571 43515.
- 572 Eddy, S.R. (2011). Accelerated profile HMM searches. *PLoS Comput Biol* 7: e1002195.

- 573 Evans, P.N., Parks, D.H., Chadwick, G.L., Robbins, S.J., Orphan, V.J., Golding, S.D. *et al.* (2015).  
574 Methane metabolism in the archaeal phylum Bathyarchaeota revealed by genome-centric  
575 metagenomics. *Science* 350: 434-438.
- 576 Farag, I.F., Biddle, J.F., Zhao, R., Martino, A.J., House, C.H. and León-Zayas, R.I. (2020). Metabolic  
577 potentials of archaeal lineages resolved from metagenomes of deep Costa Rica sediments.  
578 *ISME J* 14: 1345–1358.
- 579 Feldewert, C., Lang, K. and Brune, A. (2020). The hydrogen threshold of obligately methyl-reducing  
580 methanogens. *FEMS Microbiol. Lett.* 367: fnaa137.
- 581 Feng, X, Wang, Y. Zubin, R. and Wang, F. (2019). Core Metabolic Features and Hot Origin of  
582 Bathyarchaeota. *Engineering* 5: 498-504.
- 583 Fillol, M., Auguet, J., Casamayor, E.O. and Borrego, C.M. (2016). Insights in the ecology and  
584 evolutionary history of the Miscellaneous Crenarchaeotic Group lineage. *ISME J* 10: 665–  
585 677.
- 586 Friedrich, M.W., Schmitt-Wagner, D., Lueders, T. and Brune, A. (2001). Axial differences in  
587 community structure of Crenarchaeota and Euryarchaeota in the highly compartmentalized  
588 gut of the soil-feeding termite *Cubitermes orthognathus*. *Appl Environ Microbiol* 67: 4880-  
589 4890.
- 590 Friedrich, T. and Scheide, D. (2000). The respiratory complex I of bacteria, archaea and eukarya and  
591 its module common with membrane-bound multisubunit hydrogenases. *FEBS Lett* 479: 1-5.
- 592 Galagan, J.E., Nusbaum, C., Roy, A., Endrizzi, M.G., Macdonald, P., FitzHugh, W., et al. (2002).  
593 The genome of *M. acetivorans* reveals extensive metabolic and physiological diversity.  
594 *Genome Res.* 12: 532-542. doi:10.1101/gr.223902
- 595 Greening, C., Biswas, A., Carere, C., Jackson, C.J., Taylor, M.C., Stott, M.B., Cook, G.M. and  
596 Morales, S.E. (2016). Genomic and metagenomic surveys of hydrogenase distribution  
597 indicate H<sub>2</sub> is a widely utilised energy source for microbial growth and survival. *ISME J* 10:  
598 761–777.
- 599 Godon, J.-J., Zumstein, E., Dabert, P., Habouzit, F. and Moletta, R. (1997). Molecular microbial  
600 diversity of an anaerobic digester as determined by small-subunit rDNA sequence analysis.  
601 *Appl Environ Microbiol* 63: 2802-2813
- 602 Grieco, M.B., Lopes, F.A.C., Oliveira, L.S., Tschoeke, D.A., Popov, C.C., Thompson, C.C. *et al.*  
603 (2019). Metagenomic analysis of the whole gut microbiota in Brazilian Termitidae termites  
604 *Cornitermes cumulans*, *Cyrrillotermes strictinasus*, *Syntermes dirus*, *Nasutitermes jaraguae*,  
605 *Nasutitermes aquilinus*, *Grigiotermes bequaerti*, and *Orthognathotermes mirim*. *Curr*  
606 *Microbiol* 76: 687-697.
- 607 Gutekunst, K., Chen, X., Schreiber, K., Kaspar, U., Makam, S., and Appel, J. (2014). The  
608 bidirectional NiFe-hydrogenase in *Synechocystis sp.* PCC 6803 is reduced by flavodoxin and  
609 ferredoxin and is essential under mixotrophic, nitrate-limiting conditions. *J Biol Chem* 289:  
610 1930-1937.

- 611 Harris, R.L., Lau, M.C.Y., Cadar, A., Bartlett, D.H., Cason, E., van Heerden, E. and Onstott, T.C.  
612 (2018). Draft genome sequence of “*Candidatus Bathyarchaeota*” archaeon BE326-BA-RLH,  
613 an uncultured denitrifier and putative anaerobic methanotroph from South Africa’s deep  
614 continental biosphere. *Microbiol Resour Announc* 7: e01295-01218.
- 615 He, Y., Li, M., Perumal, V., Feng, X., Fang, J., Xie, J., Sievert, S.M. and Wang F. (2016). Genomic  
616 and enzymatic evidence for acetogenesis among multiple lineages of the archaeal phylum  
617 *Bathyarchaeota* widespread in marine sediments. *Nat Microbiol* 1: 16035.
- 618 Heider, J., Mai, X., and Adams M.W. (1996). Characterization of 2-ketoisovalerate ferredoxin  
619 oxidoreductase, a new and reversible coenzyme A-dependent enzyme involved in peptide  
620 fermentation by hyperthermophilic archaea. *J Bacteriol* 178: 780-787.
- 621 Herlemann, D.P.R., Geissinger, O., Ikeda-Ohtsubo, W., Kunin, V., Sun, H., Lapidus, A., Hugenholtz,  
622 P. and Brune, A. (2009). Genomic analysis of “*Elusimicrobium minutum*,” the first cultivated  
623 representative of the phylum “*Elusimicrobia*” (formerly termite group 1). *Appl Environ*  
624 *Microbiol* 75: 2841-2849.
- 625 Hervé, V., Liu, P., Dietrich, C., Sillam-Dussès, D., Stiblik, P., Šobotník, J. *et al.* (2020).  
626 Phylogenomic analysis of 589 metagenome-assembled genomes encompassing all major  
627 prokaryotic lineages from the gut of higher termites. *PeerJ* 8: e8614.
- 628 Hippler, B. and Thauer, R.K. (1999). The energy conserving  
629 methyltetrahydromethanopterin:coenzyme M methyltransferase complex from methanogenic  
630 archaea: function of the subunit MtrH. *FEBS Lett.* 449: 165-168.
- 631 Hochheimer, A., Linder, D., Thauer, R.K. and Hedderich, R. (1996). The molybdenum  
632 formylmethanofuran dehydrogenase operon and the tungsten formylmethanofuran  
633 dehydrogenase operon from *Methanobacterium thermoautotrophicum*. Structures and  
634 transcriptional regulation. *Eur J Biochem* 242: 156-162.
- 635 Hyatt, D., Chen, G., Locascio, P.F., Land, M.L., Larimer, F.W. and Hauser, L.J. (2010). Prodigal:  
636 prokaryotic gene recognition and translation initiation site identification. *BMC Bioinfo* 11:  
637 119-119.
- 638 Ikeda-Ohtsubo, W., Strassert, J.F.H., Köhler, T., Mikaelyan, A., Gregor, I., McHardy, A.C., Tringe,  
639 S.G., Hugenholtz, P., Radek, R. and Brune, A. (2016). ‘*Candidatus Adiatrix intracellularis*’,  
640 an endosymbiont of termite gut flagellates, is the first representative of a deep-branching  
641 clade of *Deltaproteobacteria* and a putative homoacetogen. *Environ. Microbiol.* 18: 2548-  
642 2564
- 643 Inagaki, F., Suzuki, M., Takai, K., Oida, H., Sakamoto, T., Aoki, K. *et al.* (2003). Microbial  
644 communities associated with geological horizons in coastal subseafloor sediments from the  
645 sea of Okhotsk. *Appl Environ Microbiol* 69: 7224-7235.
- 646 Jain, C., Rodriguez-R, L.M., Phillippy, A.M., Konstantinidis, K.T. and Aluru, S. (2018). High  
647 throughput ANI analysis of 90K prokaryotic genomes reveals clear species boundaries. *Nat*  
648 *Comm* 9:5114.

- 649 Kalyaanamoorthy, S., Minh, B.Q., Wong, T.K.F., von Haeseler, A. and Jermin, L.S. (2017).  
650 ModelFinder: fast model selection for accurate phylogenetic estimates. *Nat Methods* 14: 587-  
651 589.
- 652 Kanehisa, M., Sato, Y. and Morishima, K. (2016). BlastKOALA and GhostKOALA: KEGG tools for  
653 functional characterization of genome and metagenome sequences. *J Mol Biol* 428: 726-731.
- 654 Kaster, A., Moll, J., Parey, K. and Thauer, R.K. (2011). Coupling of ferredoxin and heterodisulfide  
655 reduction via electron bifurcation in hydrogenotrophic methanogenic archaea *Proc Natl Acad*  
656 *Sci* 108: 2981-2986.
- 657 Katoh, K. and Standley, D.M. (2013). MAFFT multiple sequence alignment software version 7:  
658 improvements in performance and usability. *Mol Biol Evol* 30: 772-780.
- 659 Kengen, S.W.M. and Stams, A.J.M. (1993). Formation of L-alanine as a reduced end product in  
660 carbohydrate fermentation by the hyperthermophilic archaeon *Pyrococcus furiosus*. *Arch*  
661 *Microbiol* 161: 168-175.
- 662 Koor, J. (1967). Etude radiographique du transit intestinal chez un Terme supérieur. *Experientia*  
663 23, 820–821 <https://doi.org/10.1007/BF02146863>
- 664 Kreft, J.-U. and Schink, B. (1994). O-demethylation by the homoacetogenic anaerobe *Holophaga*  
665 *foetida* studied by a new photometric methylation assay using electrochemically produced  
666 cob(D)alamin. *Eur. J. Biochem.* 226: 945-951
- 667 Kremp, F., Poehlein, A., Daniel, R. and Müller, V. (2018). Methanol metabolism in the acetogenic  
668 bacterium *Acetobacterium woodii*. *Environ. Microbiol.* 20: 4369-4384
- 669 Kröninger, L., Berger, S., Welte, C. and Deppenmeier, U. (2016). Evidence for the involvement of  
670 two heterodisulfide reductases in the energy-conserving system of *Methanomassiliicoccus*  
671 *luminyensis*. *FEBS J* 283: 472-483.
- 672 Kubo, K., Lloyd, K.G., Biddle, J.F., Amann, R., Teske, A. and Knittel, K. (2012). Archaea of the  
673 Miscellaneous Crenarchaeotal Group are abundant, diverse and widespread in marine  
674 sediments. *ISME J* 6: 1949-1965.
- 675 Kunkel, A., Vorholt, J.A., Thauer, R.K. and Hedderich, R. (1998). An *Escherichia coli* hydrogenase-  
676 3-type hydrogenase in methanogenic archaea. *Eur J Biochem* 252: 467-476.
- 677 Lang, K., Schuldes, J., Klingl, A., Poehlein, A., Daniel, R., and Brune, A. (2015). New mode of  
678 energy metabolism in the seventh order of methanogens as revealed by comparative genome  
679 analysis of “*Candidatus Methanoplasma termitum*”. *Appl Environ Microbiol* 81: 1338-1352.
- 680 Lazar, C.S., Baker, B.J., Seitz, K., Hyde, A.S., Dick, G.J., Hinrichs K. and Teske, A.P. (2016).  
681 Genomic evidence for distinct carbon substrate preferences and ecological niches of  
682 Bathyarchaeota in estuarine sediments. *Environ Microbiol* 18: 1200-1211.
- 683 Leadbetter, J.R., Schmidt, T.M., Graber, J.R. and Breznak, J.A. (1999) Acetogenesis from H<sub>2</sub> Plus  
684 CO<sub>2</sub> by Spirochetes from Termite Guts. *Science* 283: 686-689.



- 685 Lee, M.J. and Zinder, S.H. (1988). Isolation and characterization of a thermophilic bacterium which  
686 oxidizes acetate in syntrophic association with a methanogen and which grows acetogenically  
687 on H<sub>2</sub>-CO<sub>2</sub>. *Appl Environ Microbiol* 54:1 124-129.
- 688 Lemoine F, Domelevo Entfellner JB, Wilkinson E, Correia D, Dávila Felipe M, De Oliveira T,  
689 Gascuel O. Renewing Felsenstein's phylogenetic bootstrap in the era of big data. *Nature*.  
690 2018;556(7702):452–456. doi: 10.1038/s41586-018-0043-0.
- 691 Lever, M.A., Heuer, V.B., Morono, Y., Masui, N., Schmidt, F., Alperin, M.J., et al. (2010).  
692 Acetogenesis in deep seafloor sediments of the Juan de Fuca ridge flank: a synthesis of  
693 geochemical, thermodynamic, and gene-based evidence. *Geomicrobiol J* 27: 183-211.
- 694 Ludwig, W., O. Strunk, R. Westram, L. Richter, H. Meier, Yadhukumar *et al.* (2004). ARB: a  
695 software environment for sequence data. *Nucleic Acids Res* 32: 1363-1371.
- 696 Mai, X, and Adams, M.W. (1996). Purification and characterization of two reversible and ADP-  
697 dependent acetyl coenzyme A synthetases from the hyperthermophilic archaeon *Pyrococcus*  
698 *furiosus*. *J Bacteriol* 178: 5897-5903
- 699 Marchler-Bauer, A. and Bryant, S.H. (2004). CD-Search: protein domain annotations on the fly.  
700 *Nucleic Acids Res* 32: W327-W331.
- 701 Meng, J., Xu, J., Qin, D., He, Y., Xiao, X. and Wang, F. (2014). Genetic and functional properties of  
702 uncultivated MCG archaea assessed by metagenome and gene expression analyses. *ISME J* 8:  
703 650-659.
- 704 Mikaelyan, A., Meuser, K. and Brune, A. (2016). Microenvironmental heterogeneity of gut  
705 compartments drives bacterial community structure in wood- and humus-feeding higher  
706 termites. *FEMS Microbiol Ecol* 93: fiw210.
- 707 Moparthi, V.K. and Hägerhäll, C. (2011). The evolution of respiratory chain complex I from a  
708 smaller last common ancestor consisting of 11 protein subunits. *J Mol Evol* 72:5-6 484-497.
- 709 Musfeldt, M., Selig, M. and Schönheit, P. (1999). Acetyl coenzyme A synthetase (ADP forming)  
710 from the hyperthermophilic archaeon *Pyrococcus furiosus*: identification, cloning, separate  
711 expression of the encoding genes, *acdAI* and *acdBI*, in *Escherichia coli*, and in vitro  
712 reconstitution of the active heterotetrameric enzyme from its recombinant subunits. *J*  
713 *Bacteriol* 181: 5885-5888.
- 714 Nelson, W. C., Tully, B. J., and Mobberley, J. M. (2020). Biases in genome reconstruction from  
715 metagenomic data. *PeerJ*, 8, e10119
- 716 Nguyen, L., Schmidt, H.A., von Haeseler, A. and Minh, B.Q. (2015). IQ-TREE: A fast and effective  
717 stochastic algorithm for estimating maximum-likelihood phylogenies. *Mol Biol Evol* 32: 268-  
718 274.
- 719 Ochsenreiter, T., Selezi, D., Quaiser, A., Bonch-Osmolovskaya, L. and Schleper, C. (2003). Diversity  
720 and abundance of Crenarchaeota in terrestrial habitats studied by 16S RNA surveys and real  
721 time PCR. *Environ Microbiol* 5: 787-797.

- 722 Ohkuma, M., Noda, S., Hattori, S., Iida, T., Yuki, M., Starns, D. *et al.* (2015). Acetogenesis from H<sub>2</sub>  
723 plus CO<sub>2</sub> and nitrogen fixation by an endosymbiotic spirochete of a termite-gut cellulolytic  
724 protist. *Proc Natl Acad Sci* 112: 10224-10230.
- 725 Ottesen, E.A. and Leadbetter J.R. (2011). Formyltetrahydrofolate synthetase gene diversity in the  
726 guts of higher termites with different diets and lifestyles. *Appl Environ Microbiol* 77: 3461-  
727 3467.
- 728 Parks, D.H., Imelfort, M., Skennerton, C.T., Hugenholtz, P. and Tyson, G.W. (2015). CheckM:  
729 assessing the quality of microbial genomes recovered from isolates, single cells, and  
730 metagenomes. *Genome Res* 25: 1043-1055.
- 731 Quast, C., Pruesse, E., Yilmaz, P., Gerken, J., Schweer, T., Yarza, P. *et al.* (2013). The SILVA  
732 ribosomal RNA gene database project: improved data processing and web-based tools.  
733 *Nucleic Acids Res* 41: D590-D596.
- 734 Rinke, C., Chuvochina, M., Mussig, A.J., Chaumeil, P., Waite, D.W., Whitman, W.B., Parks, D.H.  
735 and Hugenholtz, P. (2020). A rank-normalized archaeal taxonomy based on genome  
736 phylogeny resolves widespread incomplete and uneven classifications. *bioRxiv* [Preprint].  
737 Available at: <https://doi.org/10.1101/2020.03.01.972265> (Accessed March 10, 2020).
- 738 Rosenthal, A.Z., Zhang, X., Lucey, K.S., Ottesen, E.A., Trivedi, V., Choi, H.M.T., Pierce, N.A. and  
739 Leadbetter, J.R. (2013) Localizing transcripts to single cells suggests an important role of  
740 uncultured deltaproteobacteria in the termite gut hydrogen economy. *Proc. Natl. Acad. Sci.*  
741 *USA* 110: 16163-16168
- 742 Schleper, C., Holben W. and Klenk, H.P. (1997). Recovery of crenarchaeotal ribosomal DNA  
743 sequences from freshwater-lake sediments. *Appl Environ Microbiol* 63: 321-323.
- 744 Schnürer, A., Svensson, B.H. and Schink, B. (1997). Enzyme activities in and energetics of acetate  
745 metabolism by the mesophilic syntrophically acetate-oxidizing anaerobe *Clostridium*  
746 *ultunense*. *FEMS Microbiol. Lett.* 154: 331-336.
- 747 Shi, Y., Huang, Z., Han, S., Fan, S. and Yang, H. (2015). Phylogenetic diversity of Archaea in the  
748 intestinal tract of termites from different lineages. *J Basic Microb* 55: 1021-1028.
- 749 Schink, B., Brune, A. and Schnell, S. (1992). Anaerobic degradation of aromatic compounds. In:  
750 *Microbial Degradation of Natural Products* (G. Winkelmann, ed.). VCH Verlagsgesellschaft,  
751 Weinheim, s219-242.
- 752 Schink, B. (1994). Diversity, ecology, and isolation of acetogenic bacteria. In: Drake H.L. (eds)  
753 *Acetogenesis*. Chapman & Hall Microbiology Series (Physiology / Ecology / Molecular  
754 *Biology / Biotechnology*). Springer, Boston, MA
- 755 Schoelmerich, M.C. and Müller, V. (2019). Energy-converting hydrogenases: the link between H<sub>2</sub>  
756 metabolism and energy conservation. *Cell Mol Life Sci* 77: 1461-1481.
- 757 Schuchmann, K. and Müller, V. (2014) Autotrophy at the thermodynamic limit of life: a model for  
758 energy conservation in acetogenic bacteria. *Nat Rev Microbiol* 12: 809-821.

- 759 Seyler, L.M., McGuinness, L.M., Kerkhof, L.J. (2014). Crenarchaeal heterotrophy in salt marsh  
760 sediments. ISME J 8: 1534-1543.
- 761 Søndergaard, D., Pedersen, C.N.S. and Greening, C. (2016). HydDB: A web tool for hydrogenase  
762 classification and analysis. Sci Rep 6: 34212.
- 763 Tersteegen, A. and Hedderich, R. (1999). *Methanobacterium thermoautotrophicum* encodes two  
764 multisubunit membrane-bound [NiFe] hydrogenases. Eur J Biochem 264: 930-943.
- 765 Thauer, R.K., Kaster, A.-K., Seedorf, H., Buckel, W. and Hedderich, R. (2008) Methanogenic  
766 archaea: ecologically relevant differences in energy conservation. Nat Rev Microbiol 6: 579-  
767 591.
- 768 Tholen, A. and Brune A. (1999). Localization and in situ activities of homoacetogenic bacteria in the  
769 highly compartmentalized hindgut of soil-feeding higher termites (*Cubitermes* spp.). Appl  
770 Environ Microbiol 65: 4497-4505.
- 771 van der Meijden, P., Heythuysen, H.J., Pouwels, A. et al. (1983) Methyltransferases involved in  
772 methanol conversion by *Methanosarcina barkeri*. Arch. Microbiol. 134: 238-242
- 773 Vorholt, J.A., Vaupel, M. and Thauer, R.K. (1996). A polyferredoxin with eight [4Fe-4S] clusters as  
774 a subunit of molybdenum formylmethanofuran dehydrogenase from *Methanosarcina barkeri*.  
775 Eur J Biochem 236: 309-317.
- 776 Welte, C. and Deppenmeier U. (2011). Membrane-bound electron transport in *Methanosaeta*  
777 *thermophila*. J Bacteriol 193: 2868-2870.
- 778 Westphal, L., Wiechmann, A., Baker, J., Minton, N.P. and Müller, V. (2018). The Rnf complex is an  
779 energy-coupled transhydrogenase essential to reversibly link cellular NADH and ferredoxin  
780 pools in the acetogen *Acetobacterium woodii*. J Bacteriol 200: e00357-18.
- 781 Xiang, X., Wang, R., Wang, H., Gong, L., Man, B. and Xu, Y. (2017). Distribution of  
782 Bathyarchaeota communities across different terrestrial settings and their potential ecological  
783 functions. Sci Rep 7: 45028.
- 784 Yu, T., Wu, W., Liang, W., Lever, M.A., Hinrichs, K. and Wang F. (2018). Growth of sedimentary  
785 Bathyarchaeota on lignin as an energy source. Proc Natl Acad Sci 115: 6022-6027.
- 786 Zhou, Z., Pan, J., Wang, F., Gu, J. and Li, M. (2018). Bathyarchaeota: globally distributed metabolic  
787 generalists in anoxic environments. FEMS Microbiol Rev 42: 639-655.

788

## 789 **8 Data Availability Statement**

790 The MAGs can be accessed at the NCBI GenBank database (Table 1) and through the IMG platform  
791 (<https://ncbi.nlm.nih.gov/genbank/> and <https://img.jgi.doe.gov/> respectively). Genome IDs and  
792 accession numbers for the NCBI SRA database are given in Table S1.

794 **Table 1.** Characteristics of the MAGs of *Bathymarchaeia* from termite guts and other members of Bathy-6 included in the analyses.

| Phylo-type <sup>a</sup> | MAG <sup>b</sup>          | Compartment | Relative abundance (%) <sup>c</sup> | Completeness (%) <sup>d</sup> | Contamination (%) <sup>d</sup> | Assembly size (bp) | Number of contigs | G+C content (mol%) | Coding density (%) | Predicted genes | Accession number <sup>e</sup> |
|-------------------------|---------------------------|-------------|-------------------------------------|-------------------------------|--------------------------------|--------------------|-------------------|--------------------|--------------------|-----------------|-------------------------------|
| 1                       | Co191P1_bin46             | P1          | 0.36                                | 95.8                          | 5.7                            | 1762101            | 230               | 37.8               | 80.2               | 1772            | WQRU00000000                  |
|                         | Co191P3_bin4              | P3          | 0.09                                | 99.1                          | 4.2                            | 1808297            | 159               | 37.8               | 79.6               | 1717            | WQSY00000000                  |
|                         | Co191P4_bin18             | P4          | 2.46                                | 99.2                          | 4.2                            | 1994150            | 212               | 37.9               | 80.0               | 1899            | WQTO00000000                  |
| 2                       | Emb289P3_bin80            | P3          | 0.13                                | 96.3                          | 6.3                            | 2128005            | 163               | 39.0               | 82.5               | 2062            | WQYG00000000                  |
| 3                       | Lab288P3_bin115           | P3          | 0.20                                | 91.5                          | 3.3                            | 1167853            | 190               | 38.2               | 86.9               | 1242            | WRCG00000000                  |
|                         | Lab288P4_bin25            | P4          | 0.13                                | 96.3                          | 3.3                            | 1375305            | 225               | 38.1               | 85.1               | 1455            | WREZ00000000                  |
| 4                       | Th196P4_bin19             | P4          | 1.76                                | 99.2                          | 3.7                            | 2287482            | 173               | 35.6               | 74.9               | 2201            | WRNB00000000                  |
| 5                       | Cu122P1_bin20             | P1          | 0.07                                | 90.0                          | 8.9                            | 1504932            | 227               | 37.4               | 84.2               | 1628            | WQTR00000000                  |
| 6                       | Nc150P3_bin14             | P3          | 0.02                                | 63.8                          | 2.3                            | 656967             | 123               | 38.5               | 84.5               | 772             | WRGI00000000                  |
|                         | Nc150P4_bin1              | P4          | 0.28                                | 98.1                          | 4.7                            | 1587817            | 173               | 38.9               | 82.6               | 1621            | WRGM00000000                  |
| 7                       | Nt197P4_bin22             | P4          | 0.76                                | 99.1                          | 4.7                            | 2179374            | 105               | 39.3               | 82.8               | 2153            | WRJX00000000                  |
| 8                       | Emb289P1_bin127           | P1          | 0.08                                | 99.1                          | 1.9                            | 2139595            | 140               | 43.4               | 82.9               | 2055            | WQVG00000000                  |
|                         | Emb289P3_bin109           | P3          | 0.23                                | 96.3                          | 2.8                            | 2080780            | 121               | 43.4               | 83.1               | 2162            | WQWQ00000000                  |
| 9                       | Lab288P3_bin169           | P3          | 1.20                                | 98.6                          | 2.8                            | 2243011            | 107               | 43.3               | 83.3               | 2269            | WRCX00000000                  |
|                         | Lab288P4_bin61            | P4          | 0.52                                | 99.1                          | 3.7                            | 2504117            | 128               | 43.0               | 83.2               | 2483            | WRFL00000000                  |
| S                       | SZUA-568 <sup>f</sup>     | NA          | NA                                  | 90.7                          | 8.4                            | 1641847            | 207               | 41.1               | 86.5               | 1810            | QKIA00000000                  |
| B                       | Be326-BA-RLH <sup>f</sup> | NA          | NA                                  | 89.8                          | 3.7                            | 2076091            | 227               | 44.9               | 86.1               | 2394            | QYYE00000000                  |
| A                       | AD8-1 <sup>f</sup>        | NA          | NA                                  | 95.8                          | 4.2                            | 1583813            | 83                | 32.4               | 84.5               | 1735            | LFWW00000000                  |

795 <sup>a</sup> Average nucleotide identity (ANI)  $\geq$  99%; for details, see Figure S1.

## Acetogenesis in termite gut *Bathyarchaeia*

- 796 <sup>b</sup> The first letters of the MAG names indicate the host species (Co, *Cornitermes* sp.; Emb, *Embiratermes neotenicus*; Lab, *Labiotermes*  
797 *labralis*; Th, *Termes hospes*; Cu, *Cubitermes ugandensis*; Nc, *Nasutitermes corniger*; Nt, *Neocapritermes taracua*).
- 798 <sup>c</sup> Relative abundance of the reads assigned to each MAG among the total number of reads in the corresponding metagenome (Hervé *et al.*,  
799 2020).
- 800 <sup>d</sup> Completeness and contamination were estimated with CheckM using 104 single-copy marker genes (Parks *et al.*, 2015). For detailed  
801 results of the CheckM analysis, see Table S1.
- 802 <sup>e</sup> For NCBI Nucleotide database; IMG genome IDs are given in Table S1.
- 803 <sup>f</sup> Referred to as phylotypes Bathy-6-S (J. Pan and Z. Zhou, unpublished), Bathy-6-B (Harris *et al.*, 2018), and Bathy-6-A (Lazar *et al.*, 2016).



## 804 10 Figure legends

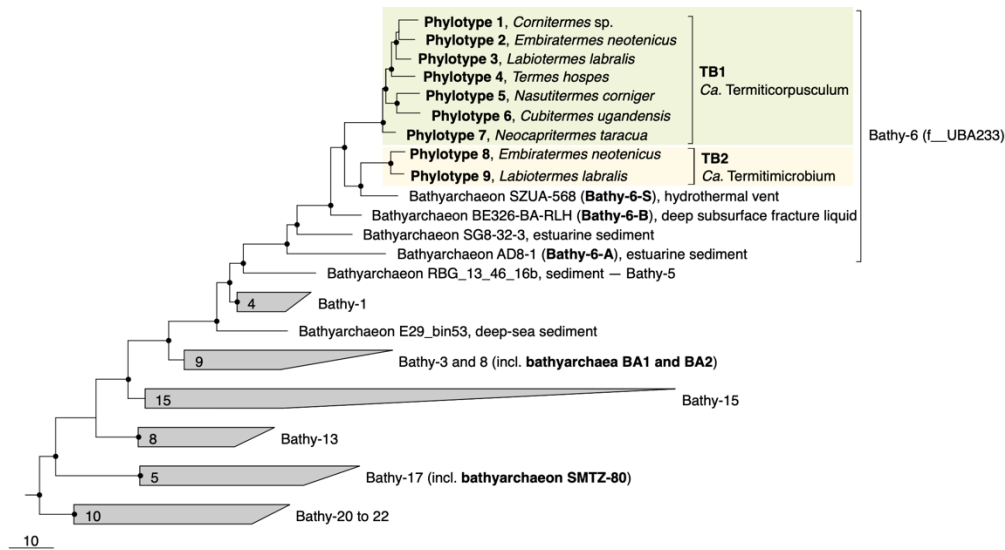

805

806 **Figure 1.** Genome-based phylogeny of termite gut *Bathyarchaeia*, illustrating the relationship of  
807 lineages TB1 and TB2 to other MAGs in the Bathy-6 subgroup (f\_\_UBA233 in the GTDB  
808 taxonomy). MAGs of other subgroups that are mentioned in the text are marked in bold. The  
809 maximum-likelihood tree was inferred from a concatenated alignment of 43 marker genes using the  
810 LG+F+I+G4 model and rooted with selected Crenarchaeota and Euryarchaeota as outgroup. A fully  
811 expanded tree with the accession numbers for all genomes is shown in the Supplementary Material  
812 (Supplementary Figure S2). The scale bar indicates 10 amino acid substitutions per site. Highly  
813 supported nodes (SH-aLRT, ● ≥ 95%, 1,000 replications) are indicated.

814

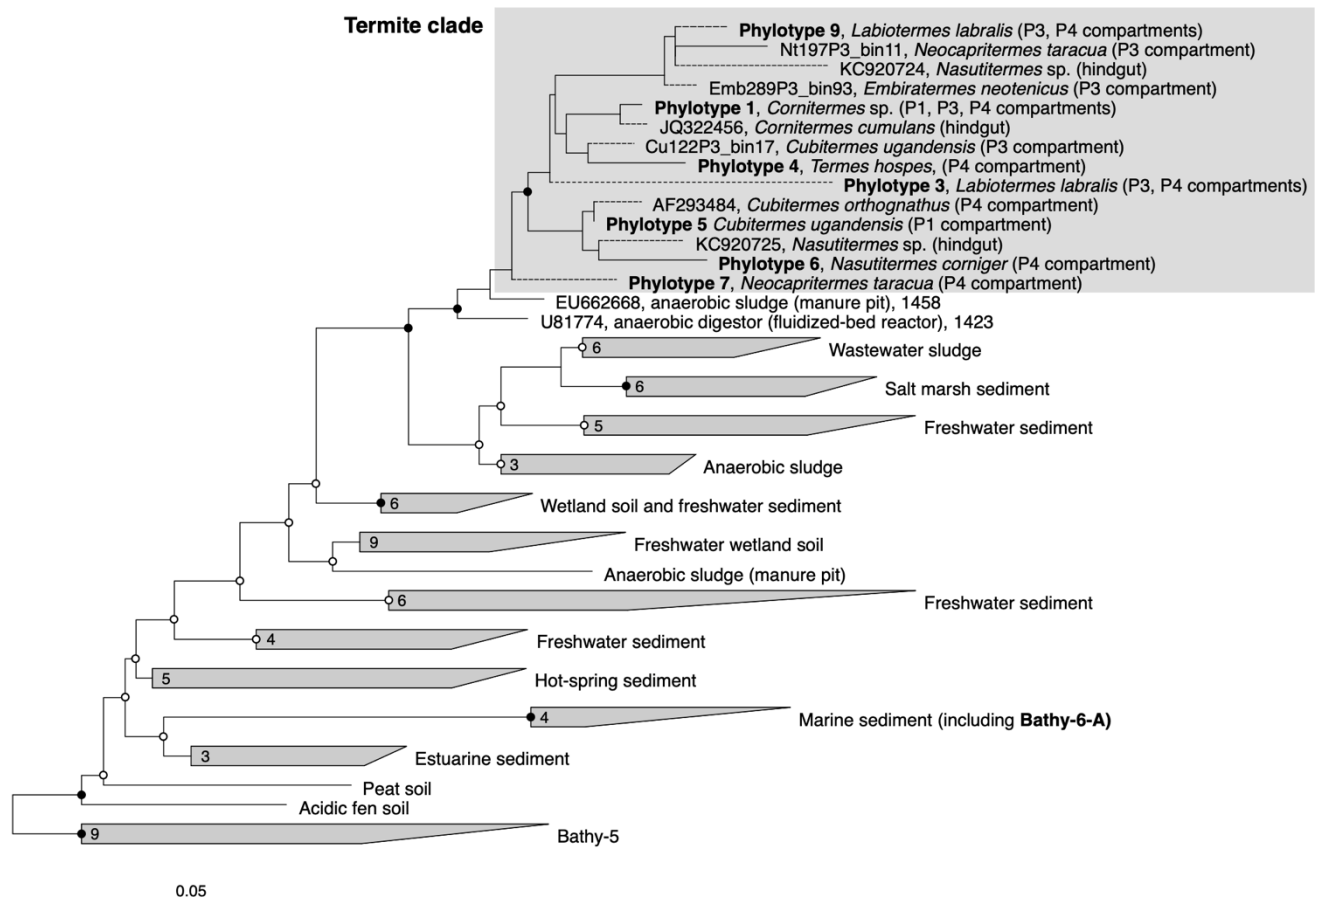

815

816 **Figure 2.** 16S rRNA-based phylogeny of subgroup Bathy-6, indicating the placement of the termite  
817 clade among *Bathyarchaeia* from other environments. The maximum-likelihood tree is based on a  
818 curated alignment (1,424 positions) of all sequences in the SILVA database and their homologs  
819 retrieved from the bathyarchaeal MAGs and the low-quality bins obtained from the termite gut  
820 metagenomes (Hervé *et al.*, 2020). The tree was rooted with members of Bathy-5 as outgroup. The  
821 scale bars indicate 0.05 nucleotide substitutions per site. SH-aLRT values (● ≥ 95%; ○ ≥ 80%, 1,000  
822 replications) indicate node support. Branches marked with dashed lines indicate shorter sequences  
823 that were added using the parsimony tool. A fully expanded tree with the accession numbers of all  
824 sequences is shown in the Supplementary Material (Supplementary Figure S3).

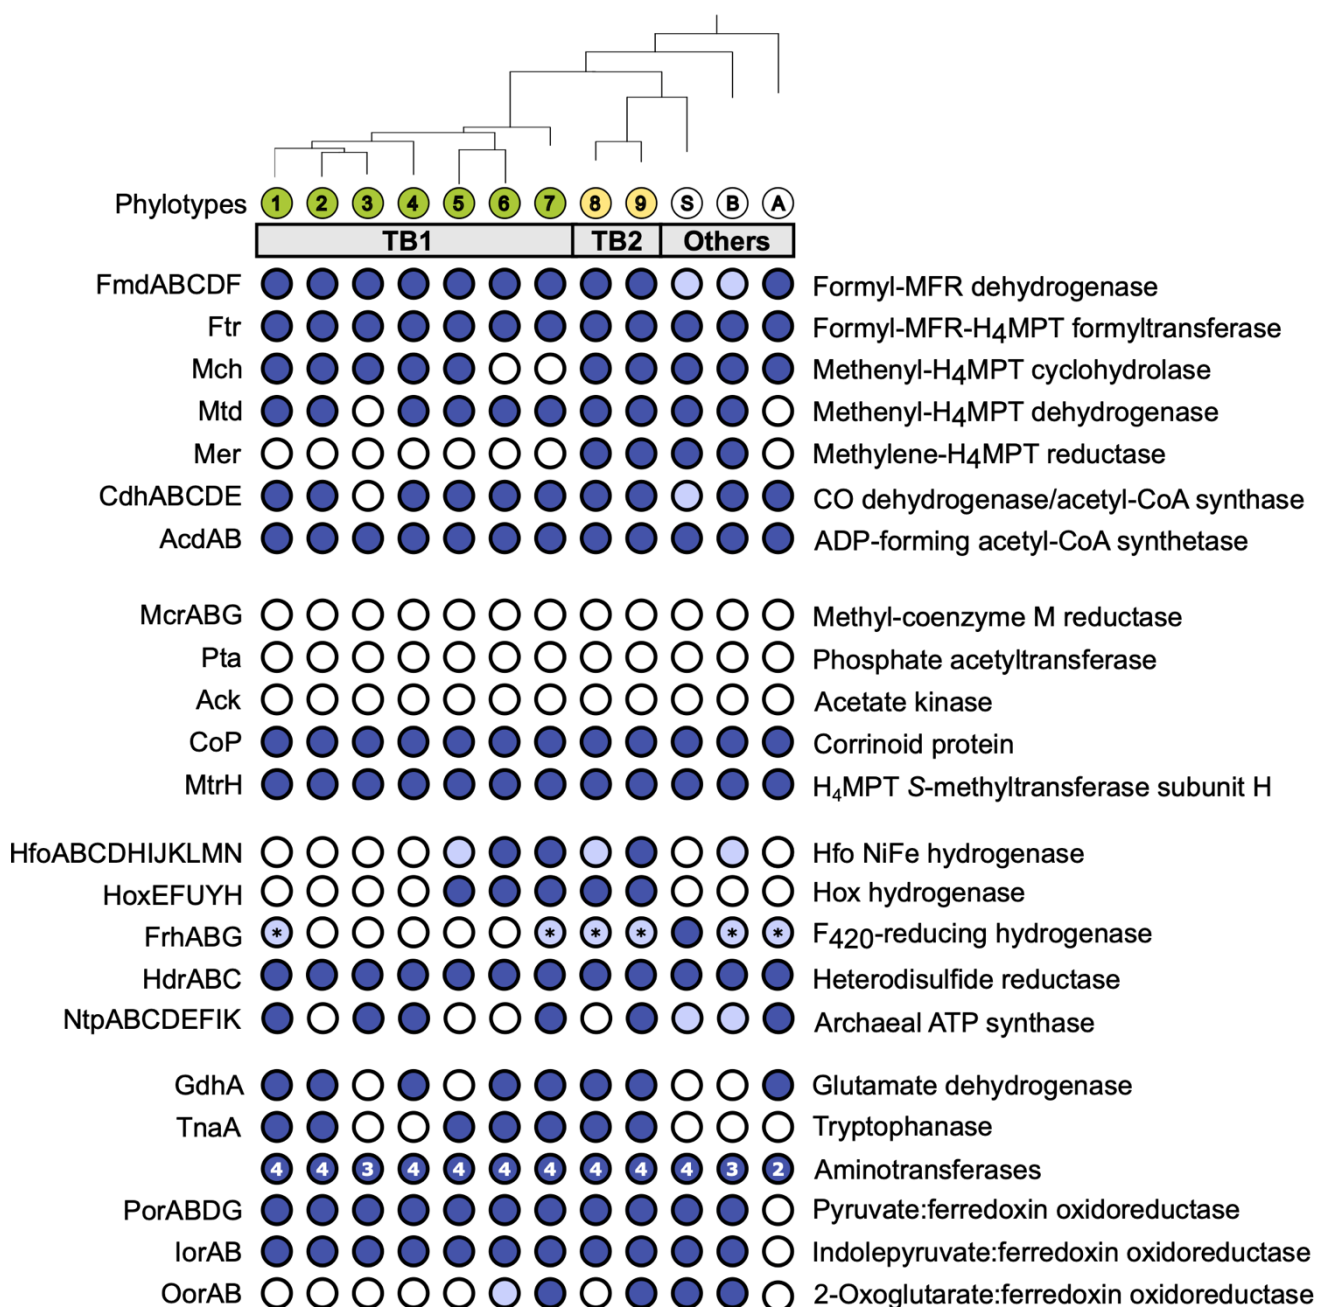

825

826 **Figure 3.** Gene functions encoded by termite gut bathyarchaea (TB1 and TB2) and other  
827 representatives of the Bathy-6 subgroup. All phylotypes with sufficiently complete genomes were  
828 included; their phylogenetic relationship was taken from Figure 1 (for strain designations, see Table  
829 1). Colored circles indicate presence and open circles indicate absence of the respective function;  
830 light blue indicates that a gene set is incomplete. The number of aminotransferases encoded by each  
831 phylotype are indicated in the circle. The asterisk (\*) in FrhABG indicates that only FrhB is present.  
832 If a phylotype is represented by more than one MAG, the annotation results were combined; details  
833 can be found in the Supplementary Material (Table S2). H<sub>4</sub>MPT: tetrahydromethanopterin, MFR:  
834 methanofuran, Fpo: F<sub>420</sub>:methanophenazine oxidoreductase.

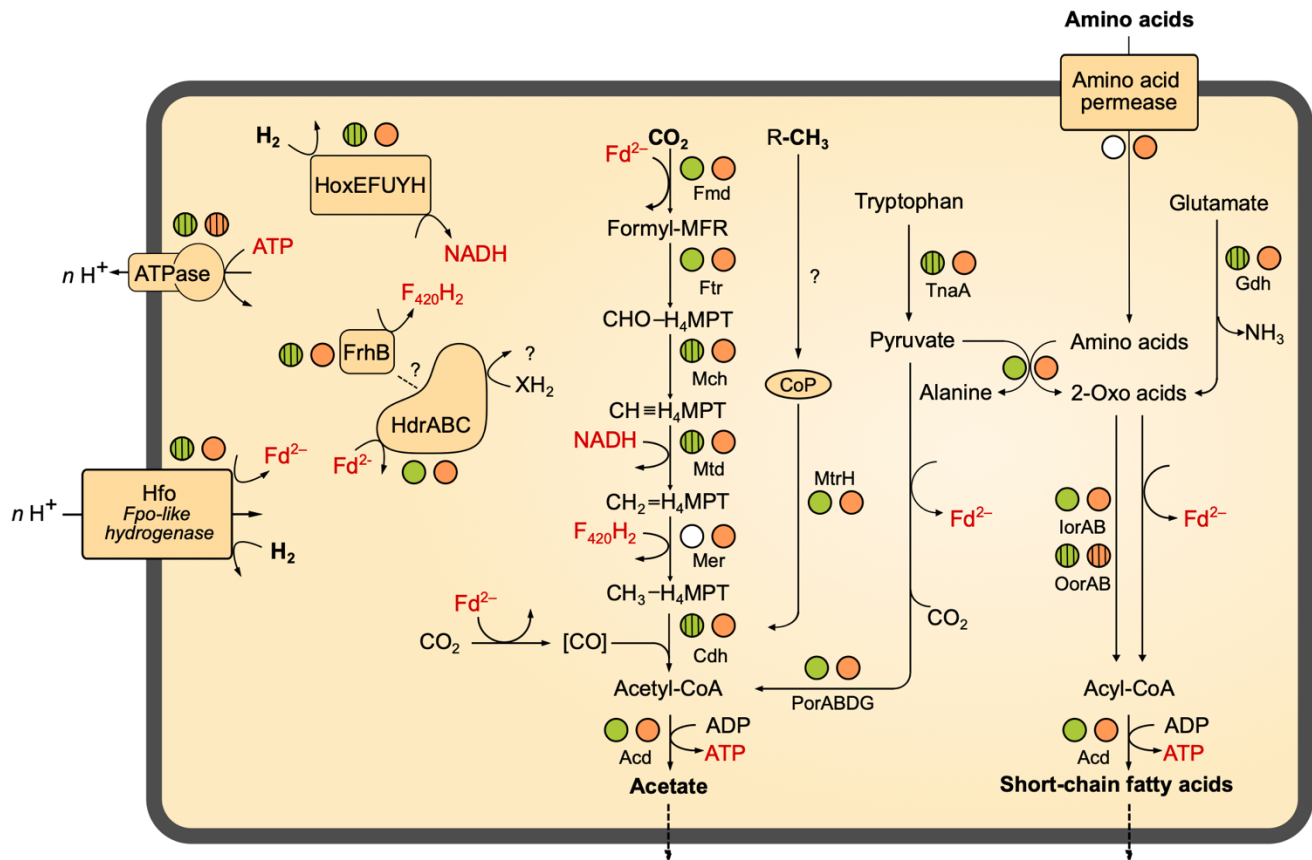

835

836 **Figure 4.** Metabolic map of termite gut *Bathyarchaeia*. The circles next to each enzyme indicate the  
 837 presence of the coding genes in TB1 (green) and TB2 (orange), respectively. Striped circles indicate  
 838 that a function is not encoded by all genomes of the respective group; a white filling indicates  
 839 absence from all MAGs of the group (see also Figure 3). The directionality of Fpo-like hydrogenase  
 840 (Hfo) and ATP (synth)ase is explained in the text. A detailed list of genes present in the respective  
 841 MAGs is provided as Supplementary Material (Supplementary Table S2).

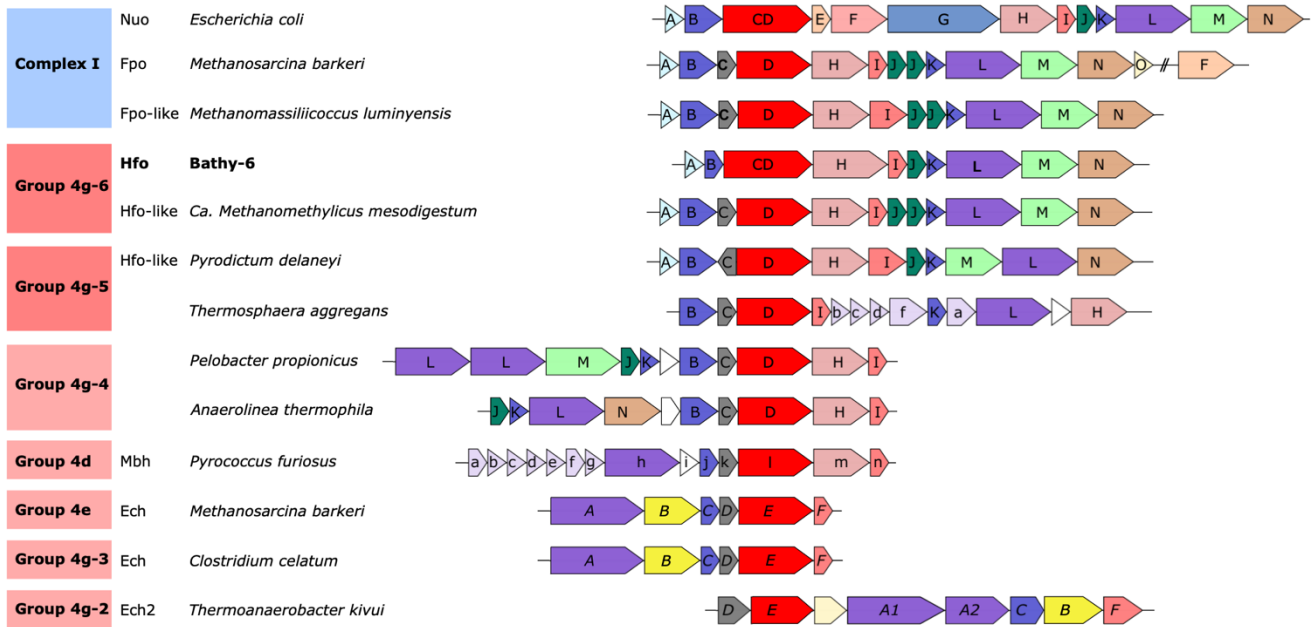

842

843 **Figure 5.** Genomic architecture of the gene clusters encoding the respiratory complex I (Nuo and  
 844 Fpo) and the ancestral [NiFe] hydrogenases in Group 4. Colors indicate homologous genes; The  
 845 phylogenetic analysis of the catalytic subunit of [NiFe] hydrogenases and its homologs (labeled in  
 846 red) is shown in Figure 6. The font style of the gene labels indicates differences in the subunit  
 847 nomenclature of Nuo/Fpo (uppercase), Mbh (lowercase), and Ech (italics).



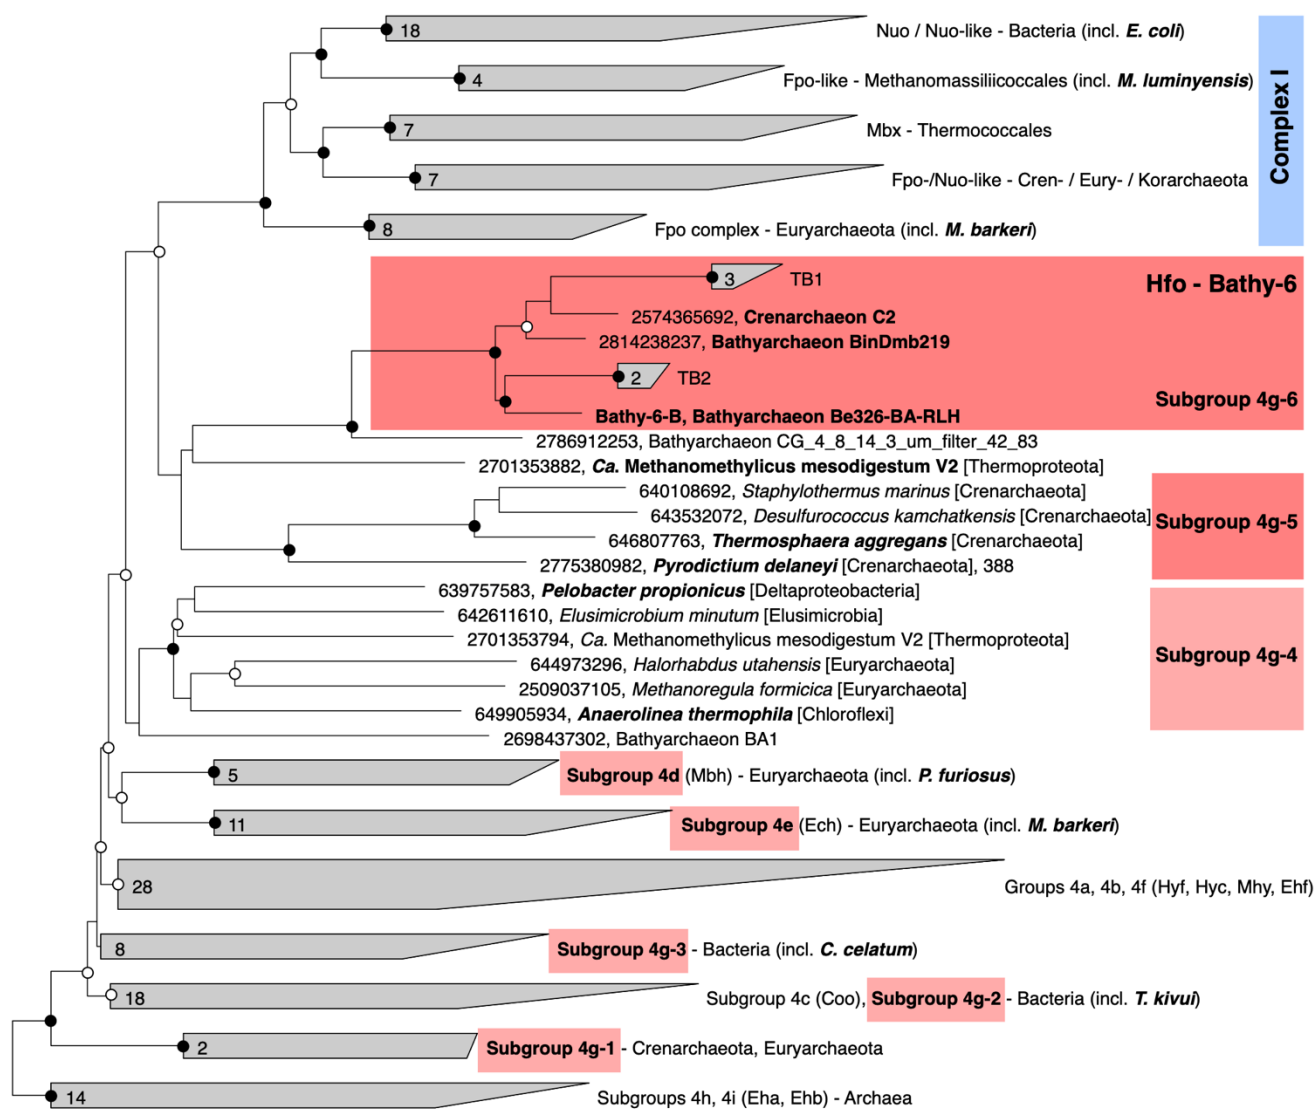

848

0.1

849 **Figure 6.** Phylogeny of the catalytic subunits of Group 4 [NiFe] hydrogenases and their homologs in  
 850 respiratory complex I (FpoD and NuoD). The maximum-likelihood tree is based on a curated  
 851 alignment of the deduced amino acid sequences; the scale bar indicates 0.1 amino acid substitutions  
 852 per site. SH-aLRT values (● ≥ 95%; ○ ≥ 80%, 1,000 replications) indicate node support. The  
 853 genomic context of the highlighted genes is shown in Figure 5. Gene numbers indicate IMG/Mer  
 854 gene IDs.

| <u>Organism</u>                           | <u>Complex</u> | <u>Subunit</u>        | <u>L1 (N-terminus)</u>                                                            | <u>L2 (C-terminus)</u>          |
|-------------------------------------------|----------------|-----------------------|-----------------------------------------------------------------------------------|---------------------------------|
| <i>Escherichia coli</i>                   | Complex I      | NuoCD                 | ..EY <b>L</b> GGCVN..//.. <b>D</b> FVMSDVDR..                                     | .. <b>D</b> PCF <b>S</b> CTDR.. |
| <i>Methanomassiliicoccus luminyensis</i>  | Complex I      | FpoD                  | .. <b>C</b> YGS <b>S</b> FTW..//.. <b>D</b> PCF <b>S</b> CTDR..                   | .. <b>D</b> PCF <b>S</b> CTDR.. |
| <i>Methanosarcina barkeri</i>             | Complex I      | FpoD                  | .. <b>C</b> Y <b>L</b> VALVN..//.. <b>D</b> PCF <b>S</b> CTDR..                   | .. <b>D</b> PCF <b>S</b> CTDR.. |
| <b>Bathy-6</b>                            | Group 4g-6     | HfoCD                 | .. <b>C</b> G <b>I</b> CNxx <b>H</b> ..//.. <b>D</b> PCF <b>S</b> CTDR..          | .. <b>D</b> PCF <b>S</b> CTDR.. |
| <i>Ca. Methanomethylicus mesodigestum</i> | Group 4g-6     | FpoD                  | .. <b>C</b> G <b>I</b> CN <b>I</b> AH..//.. <b>D</b> PCF <b>S</b> CTAR..          | .. <b>D</b> PCF <b>S</b> CTAR.. |
| <i>Pyrodictum delaneyi</i>                | Group 4g-5     | HfoD                  | .. <b>C</b> G <b>I</b> C <b>S</b> HTH..//.. <b>D</b> PCF <b>S</b> CADR..          | .. <b>D</b> PCF <b>S</b> CADR.. |
| <i>Pelobacter propionicus</i>             | Group 4g-4     | NuoD                  | .. <b>C</b> Y <b>G</b> C <b>S</b> FTW..//.. <b>D</b> PCF <b>S</b> CTDR..          | .. <b>D</b> PCF <b>S</b> CTDR.. |
| <i>Clostridium celatum</i>                | Group 4g       | EchE                  | .. <b>C</b> G <b>I</b> C <b>S</b> HSH..//.. <b>D</b> PCF <b>S</b> CLDR..          | .. <b>D</b> PCF <b>S</b> CLDR.. |
| <i>Pyrococcus furiosus</i>                | Group 4d       | MbhL                  | .. <b>C</b> G <b>I</b> C <b>S</b> F <b>S</b> H..//.. <b>D</b> PC <b>L</b> SCTDR.. | .. <b>D</b> PC <b>L</b> SCTDR.. |
| <i>Methanosarcina barkeri</i>             | Group 4e       | EchE                  | .. <b>C</b> G <b>I</b> C <b>S</b> ALH..//.. <b>D</b> PCV <b>S</b> CTER..          | .. <b>D</b> PCV <b>S</b> CTER.. |
| 855                                       |                | [NiFe]-binding motifs | <b>C##C#xxH</b>                                                                   | <b>##CxCx##</b>                 |

856 **Figure 7.** Comparison of the [NiFe]-binding motifs (L1 and L2) in the large subunits of selected  
857 Group 4 [NiFe] hydrogenases with the corresponding amino acid residues (IUPAC code) of their  
858 homologs in the respiratory complex I (Nuo and Fpo). Gray shading indicates that the typical motifs  
859 of [NiFe] hydrogenases are present (L1 motif: C[GS][ILV]C[AGNS]xxH; L2 motif:  
860 [DE][PL]Cx[AGST]Cx[DE][RL]; Vignais and Billoud, 2007). The four cysteine residues that  
861 coordinate the [NiFe] cluster are in red; other conserved residues are in blue.

862

## 863 11 Supporting Information

864 **Supplementary Figure S1.** Average nucleotide identity (ANI) of the MAGs in subgroup Bathy-6.  
865 The termite gut *Bathyarchaeia* were assigned to phylotypes based on ANI > 99%. NA indicates ANI  
866 values <75%, which are not returned by the fastANI program.

867 **Supplementary Figure S2.** Genome-based phylogeny of termite gut *Bathyarchaeia* illustrating the  
868 relationship of lineages TB1 and TB2 to other MAGs in the Bathy-6 subgroup. MAGs mentioned in  
869 the text are marked in bold. The maximum-likelihood tree was inferred from a concatenated  
870 alignment of 43 proteins using the LG+F+I+G4 model and rooted with selected Crenarchaeota and  
871 Euryarchaeota as outgroup. The numbers in circles indicate the phylotypes discussed in the text  
872 (Table 1). MAGs included in the comparative analysis (Figure 3) are shown in bold. The tree was  
873 rooted other archaeal genomes as outgroup. The scale bar indicates 10 amino acid substitutions per  
874 site. Node support values (SH-aLRT) are shown in blue. A simplified version of the tree is shown in  
875 Figure 1.

876 **Supplementary Figure S3.** 16S rRNA-based phylogeny of subgroup Bathy-6, indicating the  
877 placement of the sequences from termite guts among those obtained from other environments. The  
878 maximum-likelihood tree is based on a curated alignment (1,424 positions) of all sequences in the  
879 SILVA database and their homologs retrieved from the bathyarchaeal MAGs (in bold) and the low-  
880 quality bins obtained from the termite gut metagenomes (Hervé *et al.*, 2020). The tree was rooted  
881 using members of Bathy-5 as outgroup. The scale bars indicate 0.05 nucleotide substitutions per site.  
882 Node support values (SH-aLRT) are shown in blue. Branches marked with dashed lines indicate  
883 shorter sequences that were added using the ARB parsimony tool. A simplified version of the tree is  
884 shown in Figure 2.

885 **Supplementary Figure S4.** The methyltransferase-associated corrinoid protein (CoP) of Bathy-6 and  
886 its homologs. **(A)** The canonical methyl transferase system of bacteria and archaea. **(B)** Gene  
887 neighborhood of the CoP gene of Bathy-6 and selected homologs (for accession numbers, see panel  
888 **C**). Colors indicate the presumed functions of the respective gene products (see panel **A**). Unrooted  
889 phylogenetic trees of the methyltransferase-associated CoP genes (**C**) and the associated *mtrH* genes  
890 (**D**) of Bathy-6 and their closest relatives (deduced amino acid sequences). Genes that appear in panel  
891 **D** are shown in bold. Numbers are IMG/Mer gene IDs. The scale bar indicates 1.0 amino acid  
892 substitution per site. Node support values (SH-aLRT) are shown in blue.

893 **Supplementary Figure S5.** Phylogenetic tree of the catalytic subunit of the Hox hydrogenase of  
894 Bathy-6 and its homologs among Group 3 [NiFe] hydrogenases. The maximum-likelihood tree is  
895 based on deduced amino acid sequences and was rooted [NiFe] hydrogenase sequences of Groups 1  
896 and 2. The scale bar indicates 0.5 nucleotide substitutions per site. Node support values (SH-aLRT)  
897 are shown in blue.

898 **Supplementary Table S1.** Taxonomic assignment and characteristics of the bathyarchaeotal MAGs  
899 from termite guts (from Hervé *et al.*, 2020).

900 **Supplementary Table S2.** Annotation details of the genes that encode the metabolic pathways and  
901 other functional markers in the 15 bathyarchaeotal MAGs from termite guts, as discussed in the text  
902 (see Figures 3 and 4).

903
